## Use of Lecanemab and Donanemab in the Canadian Healthcare System: Evidence, Challenges, and Areas for Future Research

Authors:

|           |                |                                                                                                              |
|-----------|----------------|--------------------------------------------------------------------------------------------------------------|
| Eric E.   | Smith          | University of Calgary                                                                                        |
| Natalie   | Phillips       | Concordia University                                                                                         |
| Howard H. | Feldman        | University of California, San Diego                                                                          |
| Michael   | Borrie         | Western University                                                                                           |
| Aravind   | Ganesh         | University of Calgary                                                                                        |
| Alexandre | Henri-Bhargava | University of British Columbia, University of Victoria, Island Health                                        |
| Philippe  | Desmarais      | Centre Hospitalier de l'Université de Montréal                                                               |
| Andrew    | Frank          | Bruyère Research Institute, University of Ottawa                                                             |
| AmanPreet | Badhwar        | Centre de Recherche de l'Institut Universitaire de Gériatrie de Montréal, Université de Montreal             |
| Laura     | Barlow         | University of British Columbia                                                                               |
| Robert    | Bartha         | Western University                                                                                           |
| Sarah     | Best           | Western University                                                                                           |
| Jennifer  | Bethell        | KITE Research Institute, Toronto Rehabilitation Institute - University Health Network, University of Toronto |
| Jaspreet  | Bhangu         | Western University                                                                                           |
| Sandra E. | Black          | Sunnybrook Research Institute                                                                                |
| Christian | Bocti          | Université de Sherbrooke                                                                                     |
| Susan E.  | Bronskill      | Institute for Clinical Evaluative Sciences (ICES)                                                            |
| Amer M.   | Burhan         | Ontario Shores Centre and University of Toronto                                                              |
| Frederic  | Calon          | Université Laval (Faculté de pharmacie)                                                                      |
| Richard   | Camicioli      | University of Alberta                                                                                        |
| Barry     | Campbell       | University of Manitoba                                                                                       |
| D. Louis  | Collins        | McGill University                                                                                            |
| Mahsa     | Dadar          | McGill University                                                                                            |
| Mari L.   | DeMarco        | Providence Health Care, University of British Columbia                                                       |
| Simon     | Ducharme       | McGill University - Douglas Institute                                                                        |
| Simon     | Duchesne       | Laval University                                                                                             |
| Gillian   | Einstein       | University of Toronto                                                                                        |
| John D.   | Fisk           | Dalhousie University                                                                                         |
| Jodie R.  | Gawryluk       | University of Victoria                                                                                       |
| Linda     | Grossman       | Person with lived experience, McMaster University                                                            |
| Zahinoor  | Ismail         | University of Calgary                                                                                        |
| Inbal     | Itzhak         | Lady Davis Institute for Medical Research                                                                    |
| Manish    | Joshi          | University of Calgary                                                                                        |
| Arthur    | Harrison       | Person with lived experience                                                                                 |
| Edeltraut | Kroger         | Université Laval                                                                                             |

|            |                |                                                                                                                                                                        |
|------------|----------------|------------------------------------------------------------------------------------------------------------------------------------------------------------------------|
| Sanjeev    | Kumar          | University of Toronto                                                                                                                                                  |
| Robert     | Laforce, Jr.   | Laval University                                                                                                                                                       |
| Krista L.  | Lanctot        | Sunnybrook Health Sciences Centre                                                                                                                                      |
| Meghan     | Lau            | Person with lived experience                                                                                                                                           |
| Linda      | Lee            | McMaster University                                                                                                                                                    |
| Mario      | Masellis       | Division of Neurology, Department of Medicine, Sunnybrook Health Sciences Centre, University of Toronto; Hurvitz Brain Sciences Program, Sunnybrook Research Institute |
| Fadi       | Massoud        | Centre Hospitalier Charles LeMoyné / University of Sherbrooke                                                                                                          |
| Sara B.    | Mitchell       | University of Toronto                                                                                                                                                  |
| Manuel     | Montero-Odasso | Western University                                                                                                                                                     |
| Karen      | Myers          | Person with lived experience                                                                                                                                           |
| Haakon B.  | Nygaard        | University of British Columbia                                                                                                                                         |
| Stephen H. | Pasternak      | Western University, Parkwood Institute                                                                                                                                 |
| Jody       | Peters         | Person with lived experience                                                                                                                                           |
| M. Natasha | Rajah          | Toronto Metropolitan University                                                                                                                                        |
| Julie M.   | Robillard      | University of British Columbia                                                                                                                                         |
| Ken        | Rockwood       | Dalhousie University                                                                                                                                                   |
| Pedro      | Rosa-Neto      | McGill University                                                                                                                                                      |
| Dallas P.  | Seitz          | University of Calgary                                                                                                                                                  |
| Jean-Paul  | Soucy          | McGill University                                                                                                                                                      |
| Shanna C.  | Trenaman       | Dalhousie University and Nova Scotia Health                                                                                                                            |
| Cheryl L.  | Wellington     | University of British Columbia                                                                                                                                         |
| Aicha      | Zadem          | Université de Sherbrooke                                                                                                                                               |
| Howard     | Chertkow       | Rotman Research Institute, Baycrest Centre                                                                                                                             |

on behalf of the Canadian Consortium on Neurodegeneration in Aging Investigators

**Corresponding author:**

Eric E. Smith, MD, MPH  
Room 2941, Health Sciences Centre  
3330 Hospital Drive NW  
Calgary, Alberta, Canada, T2N 4N1  
[eesmith@ucalgary.ca](mailto:eesmith@ucalgary.ca)

Key words: Alzheimer’s disease, clinical trials, lecanemab, donanemab

Running title: Lecanemab and Donanemab in Canada

**Word Count: 8,811**

## List of Tables and Figures

Table 1. Summary of primary and secondary outcome measures in CLARITY-AD and TRAILBLAZER-ALZ 2

Table 2. Rate of amyloid-related imaging abnormalities

Table 3. Rates of ARIA and Mean CDR-SB Change According to APOE Genotype

Table 4. Patient selection criteria used in the clinical trials and on the FDA package labels

Table 5. Research questions

Figure 1. Design of the CLARITY-AD and TRAILBLAZER-ALZ 2 trials

Table S1. MRI protocol recommendations

Table S2. Equipment, supplies, and human resources needed for lecanemab or donanemab infusions

## ABSTRACT

Lecanemab and donanemab are monoclonal antibody therapies that remove amyloid-beta from the brain. They are the first therapies that alter a fundamental mechanism, amyloid-beta deposition, in Alzheimer disease (AD). To inform Canadian decisions on approval and use of these drugs, the Canadian Consortium on Neurodegeneration in Aging commissioned Work Groups to review evidence on the efficacy, and safety of these new therapies, as well as their projected impacts on Canadian dementia systems of care. We included persons with lived experience with Alzheimer disease in the discussion about the benefits and harms. Our review of the trial publications found strong support for statistically significant group differences, but also recognized that there are mixed views on the clinical relevance of the observed differences and the value of therapy for individual patients. The drugs are intended for persons with early AD, at a stage of mild cognitive impairment or mild dementia. If patients are treated, then confirmation of AD by positron emission tomography or cerebrospinal fluid analysis and monitoring for risk of amyloid-related imaging abnormalities was recommended, as done in the clinical trials, although it would strain Canadian resource capacity. More data are needed to determine the size of the potentially eligible treatment population in Canada.

## INTRODUCTION

Alzheimer disease (AD) is a progressive, neurodegenerative disease that causes cognitive decline and, ultimately, death(1). AD is marked by accumulation of plaques, composed of amyloid-beta, and neurofibrillary tangles, composed of tau, in the brain. The only Health Canada approved drugs to treat AD are the cholinesterase inhibitors and memantine, which have been shown to enhance cognition but do not influence accumulation of amyloid-beta(2). In 2023, phase 3 randomized controlled trials (RCTs) showed that lecanemab(3) and donanemab(4), monoclonal antibodies targeted against amyloid-beta, reduced the rate of cognitive and functional decline in persons with AD compared with placebo. Both drugs are now approved by the United States (US) Food and Drug Administration (FDA) and reimbursed by US Medicare, conditional on reporting information to an approved registry. Previously, and controversially, a drug from the same class, aducanumab, was conditionally approved by the US FDA for removal of amyloid-beta from the brain despite mixed results from two RCTs(5); however, the drug was rarely prescribed and it is no longer produced by the manufacturer.

The clinical benefits, harms, and cost effectiveness of these drugs have been controversial. In contrast to the US FDA decision, the European Medicines Agency initially declined to approve lecanemab for use in Europe, citing significant harms as well as meager benefits, but then reversed its decision on November 14, 2024, approving lecanemab for treatment of patients with zero or one copy, but not two copies, of the *APOE*  $\epsilon$ 4 allele. In the UK, the Medicines and Healthcare products Regulatory Agency (MHRA) granted approval for marketing of lecanemab and donanemab for patients with zero or one copy of the *APOE*  $\epsilon$ 4 allele. but the National Institute for Health and Care Excellence has issued draft guidance recommending against coverage by the National Health Service. In contrast, at the time of writing lecanemab has been approved in China, Israel, Japan, South Korea, and the United Arab Emirates regardless of *APOE* genotype; and donanemab has been approved in Japan. In contrast, the Australian Therapeutics Goods Administration declined to approve lecanemab.

Lecanemab and donanemab are currently under review by Health Canada, which issues approval for marketing drugs in a similar fashion as the US FDA, and the Canadian Drug Agency, which will issue a report on the drugs, including their cost effectiveness, that will be used by provincial formularies to decide whether to reimburse the costs of the drugs in each province.

Previous reports have suggested that the Canadian healthcare system is ill prepared for disease-modifying drugs for AD, with significant barriers to accessing diagnostic testing and speciality care(6,7). While these reports were sponsored by pharmaceutical companies, which could raise concerns over potential conflict of interest, similar concerns about health system readiness have been shared by Canadian editorialists from the academic community(8-10). Additionally, the clinical value of the drug effects, balanced against the risks, has engendered much debate(11).

The Canadian Consortium on Neurodegeneration in Aging (CCNA) is Canada's nationally funded dementia research network(12). To inform decisions on the utility and feasibility of lecanemab and donanemab, the CCNA commissioned a contemporary review of the effectiveness of these therapies, how they could be applied in the clinic, challenges with their potential use in the Canadian healthcare system, and a future research agenda. The primary intent of this review is to convey contemporary information on the efficacy and clinical use of these drugs to clinicians, health system administrators, regulators, and policy makers in Canada and elsewhere.

## **METHODS**

The CCNA Research Executive Committee, the main decision-making body of the CCNA, commissioned a Steering Committee for this initiative on June 7, 2024. Nine Work Groups were created by soliciting volunteers from among the 320 co-investigators of the CCNA. Additionally, to obtain the perspectives of patients and caregivers, members of the Engagement of People with Lived Experience(13) were recruited to participate in a focus group session on the benefits and risks of treatment. Members of the writing committee were required to disclose all relevant financial and professional conflicts of interest, following policies of the International Committee of Medical Journal Editors. The Chair of the Steering Committee (Smith) was required to be free of conflicts during the work of the initiative; otherwise, potential conflicts were not considered to be disqualifying but had to be disclosed when discussing any issue that might overlap with their personal or professional interests.

Work Group members reviewed peer-reviewed publications, supplemental files, and protocols of the CLARITY-AD (lecanemab)(3) and TRAILBLAZER-ALZ 2 (donanemab)(4) trials. Peer-reviewed data published prior to November 7, 2024, were prioritized. When needed, Plot Digitizer was used to extract numeric data from figures(14).

## **CLARITY-AD AND TRAILBLAZER-ALZ 2: TRIAL DESIGNS**

### **Clinical trials of lecanemab and donanemab**

The CLARITY-AD trial(3) tested the hypothesis that lecanemab, compared with placebo, would reduce the rate of decline on the Clinical Dementia Rating Sum of Boxes (CDR-SB) over

18 months(15). The CDR-SB is derived from a structured interview with both the participant and an informant, rating performance in six domains: memory, orientation, judgment and problem solving, community activities, home and hobbies, and personal care(15). The design of CLARITY-AD is shown in Figure 1A. Lecanemab is a monoclonal antibody targeted against amyloid-beta protofibrils(16). It was infused intravenously every 2 weeks at a dose of 10 mg/kg. The trial duration was 18 months, with an open-label extension period thereafter. Periodic magnetic resonance imaging (MRI) scans were required to monitor for amyloid related imaging abnormalities (ARIA).

The TRAILBLAZER-ALZ 2 trial(4) tested the hypothesis that donanemab, compared with placebo, would reduce the rate of decline on the integrated Alzheimer’s Disease Rating Scale (iADRS) over 18 months. The iADRS is a combination of scores from two widely used measures in AD trials: the Alzheimer’s Disease Assessment Scale Cognitive Subscale (ADAS-Cog; a battery of neuropsychological tests) and the Alzheimer’s Disease Cooperative Study – instrumental Activities of Daily Living scale (ADCS-iADL)(17). Thus, the primary outcome measure differed from the CLARITY-AD trial of lecanemab; however, the change in CDR-SB was reported as a secondary outcome measure, allowing comparison on the same outcome across the two trials. The study design is shown in Figure 1B. Donanemab is a monoclonal antibody targeted against plaque amyloid(18). It was infused intravenously every 4 weeks, beginning at 700 mg IV each month for 3 months and then increased to the target dose of 1400 mg IV every month. The schedule of MRIs is shown in Figure 1B. Randomization was stratified by level of tau, measured by positron emission tomography (PET): “low-medium tau” (meaning that tau was only mildly or moderately elevated above normal) and “high tau” (more than moderately elevated). According to the trial protocol, there were two primary outcomes: change in iADRS in the low-medium tau group, and change in iADRS in the combined tau group, pooling the low-medium and high groups. A unique feature of TRAILBLAZER-ALZ2 was that donanemab infusions were stopped if follow-up amyloid-PET signal normalized, which was achieved in 29.7% of participants at the 6-month follow-up and 76.4% of participants at the 12-month follow-up.

In the remainder of this document, we will collectively refer to lecanemab and donanemab as anti-amyloid-beta monoclonal antibodies (anti-A $\beta$  mAbs).

## **BENEFITS AND HARMS OF TREATMENT**

### **Clinical meaning of the benefits**

No aspect of the trials has engendered more controversy than the clinical value of the drug effects on participant well-being and quality of life. In the clinical trials, across all participants the relative change in cognitive and functional decline was proportionally much less than the relative reduction in amyloid-PET signal(3,4). The reasons for this discrepancy are unknown, but could include lack of effect on soluble precursors to amyloid (e.g., oligomeric A $\beta$ ) that are not measured by existing biomarkers, feed-forward neurodegenerative loops that were triggered by amyloid-beta but can no longer be interrupted by its removal, unexpectedly high contributions of comorbidities that are independent of amyloid-beta (including vascular, Lewy body, and other pathologies), or subtle adverse cognitive effects of the drugs. Research is urgently needed to determine the cause of this discrepancy, with important implications for the value that can ultimately be expected of this drug class.

The effects of these medications on the primary and important secondary study outcomes are shown in Table 1(3,4,19). In the primary analysis of the CLARITY-AD trial of lecanemab, the adjusted least-squares mean change from baseline at 18 months (more positive scores are worse) was 1.21 with lecanemab and 1.66 with placebo (difference  $-0.45$ ; 95% CI  $-0.67$  to  $-0.23$ ,  $p<0.001$ ). In TRAILBLAZER-ALZ 2 outcomes were reported separately for the low/medium tau population and the combined population, which included high tau as well as low/medium tau(4). In the primary analysis, the adjusted least-squares mean change from baseline at 18 months (more negative is worse) in donanemab compared with placebo in the low/medium tau population was  $-6.02$  versus  $-9.27$  (difference  $+3.25$ , 95% CI  $+1.88$  to  $+4.62$ ,  $p<0.001$ ; relative difference 35.1%) and in the combined tau population was  $-10.19$  versus  $-13.11$  (difference  $+2.92$ , 95% CI  $19.9-50.2\%$ , 95% CI  $+1.51$  to  $+4.33$ ,  $p<0.001$ ; relative difference 22.3%). In both trials, the models included terms for the interaction of treatment by visit, which tests the difference in slopes between treatment and placebo, but these model coefficients were not reported.

Some expert opinion has been skeptical of the clinical value of the effects. The European Medicine Agency, to justify their initial decision to decline approval of lecanemab (which was subsequently reversed), stated that the “difference between the two groups was small”. Experts have also noted that treatment may not be desirable for patients who dislike interacting with the health care system or do not live near a major academic medical center(8,20). But for individuals who are eager to slow the disease, even without large benefits on quality of life, the benefits compared with the risks may be acceptable. Research on patient, caregiver, and public opinion has so far been limited.

Experts have noted that the differences between treatment and placebo groups in the trials were less than previously derived minimal clinically important differences (MCIDs) for the primary outcomes. However, MCIDs are, by design, estimates of thresholds for meaningful change within a single individual, and should not be used to judge the clinical value of group average differences(21). To judge the trial outcomes on their MCIDs, one would need to identify the proportion of individuals in each group that did or did not exhibit a meaningful change, which so far has not been reported. There may be a minority of participants who would be considered individual responders, with larger, more clearly meaningful clinical benefits. Another reported method for expressing the meaning of group differences is in “time saved”(22). Analyses of CLARITY-AD and TRAILBLAZER-ALZ 2 suggest that the time saved on the iADRS was 5.3 months over 18 months of treatment, meaning that at the end of 18 months the treated group on average had a CDR change that was the same as what the placebo group had experienced 5.3 months earlier(22).

Future research on clinical effects should include more comprehensive assessment of effects across different neuropsychological domains, participant-reported quality of life, caregiver burden, caregiver health and quality of life, and how these relate to changes in cognition and CDR-SB(23-25). Improved quality of life for both participant and study partner were seen in the CLARITY-AD trial of lecanemab(19). Fuller reporting of trial primary and secondary outcomes, including the confidence limits around change over time in CLARITY-AD and interactions between treatment and time for both trials, is encouraged.

A disease-modifying treatment that alters the slope of decline will continue to accrue benefit the longer it is applied, assuming the slopes of decline remain linear over time. However, to date the only published data are from the first 18 months of treatment in the randomized trials, and the slopes of decline have not been compared statistically to quantify their divergence. It will

be critically important to collect data from open label extensions of these trials, and from routine practice, to evaluate the slope of decline with longer term treatment. It is also important to collect data on rate of decline after treatment is stopped, including when treatment is stopped because the amyloid-beta is cleared as was done in TRAILBLAZER-ALZ 2.

### **Clinical effect: perspective of persons with lived experience**

Recent developments in anti-A $\beta$  mAb therapies were discussed with people with lived experience of dementia through the CCNA Engagement of People with Lived Experience of Dementia (EPLIED) program(13). Contributors included a person living with dementia, and four current and former caregivers and care partners, including one who took part in a trial of another disease modifying therapy. The contributors were offered pre-readings(8,20) and took part in a 90-minute discussion about the therapies. Themes that emerged included a desire for patient and care partner choice, but also concerns regarding quality of life, access to a variety of care options, and lack of resources.

Decisions around engaging with new anti-A $\beta$  mAb therapies were seen as personal and to depend on, among many factors, life-stage, disease stage, caregiver support, availability and accessibility of services and, potentially, ability to pay for treatment (e.g., private insurance). These factors must be considered in individual decision-making, but some must also be considered as potential indicators of structural and social determinants of health that might result in inequitable access to care.

Any clinical benefits derived from disease modifying therapy in early/mild stage dementia must be considered against the potential to also prolong later stage dementia, when the symptoms are severe and caregiver burden is high. Key considerations for developing and implementing new therapies were seen to include determining their long-term impacts on an individual's symptoms and quality of life, as well as their caregiver health and wellbeing, to inform when and how to also discontinue treatment.

Participants expressed concern that dementia care is underfunded and without substantial increased investment across multiple areas of the health and social care system (e.g., home care, long-term care, palliative care and caregiver support), focused investment in the infrastructure that would be required to support treatment with anti-A $\beta$  mAbs was not seen as the best use of limited resources.

Many individuals and families already face challenges in obtaining a timely dementia diagnosis. Given that treatment is contingent on early diagnosis (and ongoing monitoring), potential for existing gaps and disparities in health service use(26,27) to extend to effective treatment with anti-A $\beta$  mAbs must be addressed.

Finally, there were calls to invest in research on more effective therapies, even though investment so far has been mostly disappointing, with many failures. However, these failures were also seen to highlight the imperative to not only advance therapies, but also to develop and implement effective approaches to primary prevention as well as non-pharmacological services and supports for persons living with dementia and their caregivers.

### **Amyloid related imaging abnormalities and other adverse effects**

Amyloid-related imaging abnormalities (ARIA) are the most important potential adverse effects of treatment with anti-A $\beta$  mAbs. In addition to ARIA, headache (possibly because of ARIA) and infusion reactions (discussed in more detail in the section on Organizing Care) were more common with treatment than placebo.



ARIA refers to MRI evidence of vasogenic edema or bleeding that can occur in response to anti-A $\beta$  mAbs. A consensus group convened by the Alzheimer's Association defined ARIA with edema (ARIA-E) as "MRI alterations thought to represent edema in the gray and white matter, and effusion or extravasated fluid in the sulcal space (28). ARIA with hemorrhage (ARIA-H) was defined as MRI findings thought to represent hemosiderin deposits, including microbleeds, macrohemorrhages, and superficial siderosis(28).

The incidence of ARIA-E and ARIA-H in the CLARITY-AD and TRAILBLAZER-ALZ 2 trials is shown in Table 2. The rate of ARIA-E and ARIA-H was higher in donanemab-treated participants than lecanemab-treated participants; however, this difference should be viewed cautiously because the two drugs were not compared head-to-head in the same trial. When ARIA occurred, it was usually early in the treatment course: in TRAILBLAZER-ALZ 2, 58% of first instances of ARIA-E occurred within the first three doses(4). ARIA also occurred in the placebo groups: ARIA-E was about 1/10<sup>th</sup> as common, and ARIA-H was about half as common in placebo compared with treatment.

While most ARIA in CLARITY-AD and TRAILBLAZER-ALZ 2 was recorded as asymptomatic by site investigators, there were 3% of participants on lecanemab and 6% of participants on donanemab who had symptoms. ARIA symptoms can include headache, confusion, seizure, or hemorrhagic stroke. In TRAILBLAZER-ALZ 2, 3.3% permanently discontinued donanemab treatment due to ARIA, and three cases of ARIA were fatal. In CLARITY-AD, fatal events and discontinuations were not reported separately for ARIA, but 6.9% permanently discontinued lecanemab treatment for any reason, including reasons unrelated to ARIA. The mortality rate was not statistically different in treatment compared with placebo in either trial (0.7% vs. 0.8% for lecanemab, and 1.9% vs. 1.0% for donanemab).

The presence of cerebral amyloid angiopathy (CAA)(29) or one or two copies of the *APOE*  $\epsilon$ 4 allele increases the risk of ARIA(29). In CLARITY-AD and TRAILBLAZER-ALZ2, the risk of ARIA was modified by *APOE*  $\epsilon$ 4 status (Table 3). There was a strong, graded relationship between ARIA risk and *APOE* status for both lecanemab and donanemab, with 40-50% of *APOE* homozygotes experiencing ARIA.

Guidance on ARIA management is provided by the FDA package labels for lecanemab and donanemab, and from expert consensus recommendations for lecanemab(30). Management is based on the intersection of clinical symptom severity with radiological severity, according to provided definitions, and generally consists of extra MRI monitoring for asymptomatic radiologically mild ARIA, suspending doses until radiological resolution or stabilization for mild to moderate clinical symptoms and radiological signs, and permanently discontinuing drug for severe clinical symptoms or severe radiological signs. With this management, ARIA-E usually resolves within 4-8 weeks(29).

### **Efficacy in subgroups**

In the CLARITY-AD and TRAILBLAZER-ALZ 2 trials, effects were reported in some subgroups, including age, sex, AD stage (MCI vs dementia), race/ethnicity, and, for TRAILBLAZER-ALZ 2, tau level(3,4). Caution should be exercised when interpreting the results of these multiple post-hoc exploratory tests(31), which should be considered hypothesis-generating and not definitive. Adjusted mean differences in treatment vs placebo are reported here for the primary trial outcomes: for CLARITY-AD, the CDR-SB, in which *negative* differences favour treatment with lecanemab; and for TRAILBLAZER-ALZ2, the iADRS, in which case *positive* differences favour treatment with donanemab.

Across all primary and secondary end points, lecanemab and donanemab slowed decline on cognitive and functional composite scales significantly more than placebo for participants in the 65-74 years and  $\geq 75$  years age groups (supplemental figures S1(3) and E9(4), respectively). In the  $<65$  year group, lecanemab and donanemab slowed decline but not significantly more than placebo although the confidence limits were wide (lecanemab -0.08 [95% CI -0.51 to +0.33]; donanemab low/medium tau population +2.09 [95% CI -3.36 to 7.66]; donanemab combined tau population +2.24 [95% CI -2.17 to +6.70]).

Efficacy was assessed according to participants' sex in both trials. In CLARITY-AD, lecanemab was less efficacious, and not statistically significant, in females (-0.20 [95% CI -0.52 to +0.09], 12% slowing) compared with males (-0.73 [95% CI -1.01 to -0.42], 43% slowing). A similar lack of statistical significance in females was seen for multiple secondary outcomes including neuropsychological testing and activities of living. In contrast, in TRAILBLAZER-ALZ 2, donanemab had similar or greater effectiveness in females than males: +3.38 [95% CI +1.12 to +5.28] vs +3.15 [95% CI 1.63 to 5.28] in the low/medium tau population, and +3.51 [95% CI +1.66 to 5.38] vs +2.09 [95% CI -0.13 to +4.31] in the combined tau population.

The CLARITY-AD(3) and TRAILBLAZER-ALZ 2(4) trials included participants with MCI or dementia. In CLARITY-AD, lecanemab was efficacious for participants with MCI (-0.35 [95% CI -0.60 to -0.13, 41% slowing) and mild dementia (-0.62 [95% CI -1.06 to -0.18], 22% slowing)(3). In TRAILBLAZER-ALZ2, AD stage was classified based on Folstein MiniMental Status Exam as MCI ( $\geq 27$ ), mild dementia (MMSE 20-26), and moderate dementia (MMSE  $<20$ )(4). In the low/medium tau population, donanemab was borderline efficacious in MCI (+2.92 [95% CI +0.04 to +1.63], 55% slowing) and efficacious in mild dementia (+ 2.54 [95% CI +0.93 to +4.25, 30% slowing) and moderate dementia (+5.51 [95% CI +2.24 to +8.87], 35% slowing). In the combined tau population, donanemab trended toward efficacy in MCI (+2.14 [95% CI -1.20 to +5.48], 39% slowing) and was efficacious in mild dementia (+2.25 [95% CI +0.54 to +4.00], 19% slowing) and moderate dementia (+3.70 [95% CI +0.84 to +6.70], 18% slowing). In TRAILBLAZER-AL 2, the efficacy of donanemab was weaker, and not statistically significant, in participants with high tau (+1.26 [95% CI -1.71 to +4.31]) than low/medium tau (+3.25 [95% CI +1.86 to +4.71]). These data raise the possibility that the effect of treatment, expressed as the percent slowing of progression, decreases as the AD stage worsens, with accumulating tau burden, from MCI to moderate dementia (although point estimates for the MCI stage are accompanied by wide confidence limits).

Both trials assessed efficacy according to the apolipoprotein E epsilon 4 (*APOE4*) allele status of participants (Table 3). Both lecanemab and donanemab were efficacious in the subgroups with no  $\epsilon 4$  allele and *APOE*  $\epsilon 4$  heterozygotes. However, in *APOE*  $\epsilon 4$  homozygotes the effects were closer to the null and not statistically significant, but with wide confidence intervals (lecanemab: +0.28 [95% CI -0.35 to +0.88]; donanemab low/medium tau +1.91 [95% CI -1.40 to +5.32]; donanemab combined tau +1.01 [95% CI -2.37 to +4.36]). A dose-response relationship was seen in both trials, where effect sizes across all end points decreased with the number of  $\epsilon 4$  allele copies.

While subgroup analyses were performed to assess efficacy of lecanemab and donanemab according to race and ethnicity, these analyses were considerably underpowered as non-Whites represented 23.2% and 8.5% of participants in the CLARITY-AD and TRAILBLAZER-ALZ 2 trials, respectively(3,4). For lecanemab, there was no evidence of different effects by race--classified as White, Asian, or Black—or ethnicity, classed as Hispanic or not Hispanic. In the TRAILBLAZER-ALZ 2 trial of donanemab, where race and ethnicity were categorized as in

CLARITY-AD, the point estimate for Blacks favoured placebo rather than donanemab, but the confidence intervals were very wide, in the low/medium tau population (-2.68 [95% CI -10.69 to +5.41]) and the combined population (-2.35 [95% CI -11.64 to +6.80]). Additionally, the efficacy for Hispanics was not statistically significant confidence intervals in the low/medium tau population (-1.24 [95% CI -8.35 to +6.02]) and the combined population (+1.28 [95% CI -6.29 to +8.94]). Data were not available for North American Indigenous persons or subgroups of Asian ethnicities.

Subgroup analyses of ARIA risk were confined to the relationship with *APOE* genotype, which we reported in the section on ARIA. The trials did not provide risks of ARIA-E and ARIA-H according to age group, sex, or clinical stage of AD(3,4).

In summary, there were significant knowledge gaps with respect to potential efficacy in important subgroups. The potential decreased efficacy of lecanemab in female participants in the CLARITY-AD trial is concerning, considering AD affects more females than males around the globe. Future studies should investigate specifically the effects of sex and gender on efficacy and safety as these factors may have clinical importance in personalizing therapies for a patient. Additionally, future trials should recruit more diverse populations to increase confidence in the efficacy and safety of treatment across different ethnic groups.

Future studies should investigate efficacy and safety in patients with early-onset (< 65 years) and preclinical phases of AD (*i.e.*, asymptomatic amyloid positive individuals). As well, the effects of anti-A $\beta$  mAbs should also be assessed in the "old-old" (*i.e.*,  $\geq 85$  years) and in the frail adults, considering the increasing incidence and prevalence of AD with aging and the increasing prevalence of comorbidity and polypharmacy with aging.

## CONSIDERATIONS FOR PROVIDING TREATMENT IN CLINICAL PRACTICE

### Patient selection in clinical practice

The selection criteria of CLARITY-AD and TRAILBLAZER-ALZ 2 were complex, with information collected at screening that is not part of usual clinical care (Table 4). Selection of patients for treatment in practice will require simpler, more pragmatic criteria. The FDA package labels for lecanemab and donanemab recommend that they are indicated for mild cognitive impairment or mild stage dementia due to AD (Table 4). A group of experts has provided consensus recommendations for selection of patients for treatment in routine practice(30).

There is consensus that *APOE* genotype testing, which is not currently part of clinical practice in Canada, should be done prior to treatment to inform the risk of ARIA. The risk of ARIA increases with each additional copy of the *APOE*  $\epsilon 4$  allele. *APOE*  $\epsilon 4$  homozygotes are at especially high risk for ARIA, and probably derive less benefit from treatment (Table 4; also see the sections on ARIA and Efficacy in Subgroups). The FDA package labels for lecanemab and donanemab recommend that *APOE*  $\epsilon 4$  status should be ascertained prior to treatment, and that ARIA risk should be discussed with patients. Notably, the UK MHRP for lecanemab excludes individuals who are *APOE*  $\epsilon 4$  homozygotes. The CCNA recommends that, in obtaining consent for treatment with anti-A $\beta$  mAbs, clinicians should cite the higher risk and potential for less benefit in persons who are *APOE*  $\epsilon 4$  homozygotes.

Patients taking anticoagulants or given thrombolytics may be at risk for intracranial hemorrhage, based on limited data. Media reports have indicated that two trial participants taking lecanemab had fatal intracranial hemorrhages while taking anticoagulants(32), and one

participant taking lecanemab had intracranial hemorrhage after being treated with thrombolysis for acute ischemic stroke(33). Data presented at a scientific conference, but not yet published in a peer-reviewed journal, indicated that 2/140 participants on anticoagulants died with concurrent macrohemorrhage while taking lecanemab compared with 0/74 patients on anticoagulants taking placebo(30). The FDA package labels for lecanemab and donanemab recommend “caution” when treating patients on anticoagulants. Many of the ongoing trials of the anti-A $\beta$  mAbs are excluding patients on anticoagulants. So far, no safety concerns have arisen in patients taking antiplatelet drugs such as aspirin; however, there are insufficient data on patients taking multiple antiplatelet drugs. In accordance with an expert consensus group(30), the CCNA recommends against treatment of patients on anticoagulants.

Patients with variant AD phenotypes (including posterior cortical atrophy, logopenic aphasia, or frontal behavioural variant) could have early-stage AD but not satisfy CLARITY-AD or TRAILBLAZER-ALZ 2 cognitive testing criteria due to the nature of their symptoms, including confounding of testing by visual impairment or aphasia. Whether these patients can be treated safely and effectively is not clear. If treatment of these patients is contemplated, it will be essential to prove that amyloid-beta, the target for treatment, is present in the brain, and that functional impairment is mild, indicating mild AD analogous to the CLARITY-AD and TRAILBLAZER-ALZ 2 inclusion criteria. In patients with posterior cortical atrophy or logopenic aphasia, the MMSE may be confounded by disproportionate visuospatial or language dysfunction, and cut-offs used in the trials may not be appropriate.

Patients with severe WMH or multiple infarcts, suggesting a vascular contribution to cognitive decline, were excluded from the trials. The CCNA Work Group suggested that these patients should be excluded from treatment in routine clinical practice, as well. Whether treatment benefits patients with significant cerebrovascular disease as well as a positive amyloid-beta biomarker is an important question that warrants further study in future clinical trials.

In the TRAILBLAZER-ALZ 2 trial of donanemab, elevated tau-PET was required for eligibility and recruitment was stratified by tau level(4). However, the FDA label for donanemab does not require testing for tau, and the CCNA Work Group similarly recommends that assessment of tau is not necessary prior to treatment.

### **Diagnostic confirmation of AD**

Enrollment in CLARITY-AD or TRAILBLAZER-ALZ 2 required biomarker confirmation of amyloid-beta in the brain(3,4). The CCNA Work Group agreed that this should be retained as a criterion for receiving anti-A $\beta$  mAbs, given prior evidence that the rate of false positive AD diagnosis is unacceptably high (approximately 25%(34)) without AD biomarker testing. The best validated diagnostic tests for amyloid-beta are amyloid-PET (in the trials, florbetaben(3), flutemetamol(3), or florbetapir(3,4) ligands were used) and CSF A $\beta$ 42 measured and reported as a ratio with either tau proteoforms (total-tau [t-tau] or phosphorylated-tau [p-tau]) or A $\beta$ 40. However, AD biomarker testing is not done routinely in patients suspected of AD in Canada. The Canadian Consensus Conference on Diagnosis and Treatment of Dementia (CCCDTD) recommends that amyloid-PET or CSF AD biomarker testing are not needed for routine diagnosis, but may be useful for patients in whom the underlying pathological process is not clear despite specialist evaluation(35). The use of amyloid imaging should follow guidelines from the Specialized Task Force on Amyloid Imaging in Canada(36).

The CCNA Work Group recommends that amyloid-PET is the preferred method for providing diagnostic confirmation of brain amyloid-beta. The anti-A $\beta$  mAbs lecanemab and

donanemab have been validated to reduce amyloid-PET signal(3,4). In general, across all anti-A $\beta$  mAbs the degree of amyloid PET signal reduction correlates with the degree of clinical benefit(37). Furthermore, in the TRAILBLAZER-ALZ2 trial, treatment with donanemab was stopped if the amyloid-PET signal was normalized(4). The CCNA Work Group recommends that the SNMMI Procedure Standard/EANM Practice Guideline for Amyloid PET Imaging of the Brain(38) should be used as a guide to acquiring, processing, and interpreting those studies. The use of amyloid imaging should follow guidelines from the Specialized Task Force on Amyloid Imaging in Canada(36).

A challenge to using PET for AD diagnosis in Canada is the limited and variable access across provinces. There are only 45 PET cameras in Canada, with 24 in Quebec and 12 in Ontario(39). Florbetaben is the sole imaging agent for amyloid-beta that is used clinically in Canada, but its production is confined to Quebec and Ontario. Although cyclotrons are present in other regions, enabling potential synthesis at these sites, scanning capacity is restricted.

The current alternative to amyloid PET is lumbar puncture (LP) for CSF analysis. In AD, the concentration of abeta peptide 1-42 (A $\beta$ 42) in CSF is reduced(40). The highest diagnostic performance for CSF biomarkers is achieved when A $\beta$ 42 is reported as a ratio to A $\beta$ 40, p-tau or t-tau. AD CSF biomarkers are highly concordant with amyloid-PET and the gold standard, neuropathological evaluation(41,42). Although well validated for AD diagnosis, there are fewer data on the responsiveness of CSF AD biomarkers to anti-A $\beta$  mAbs; therefore, it is not yet clear whether repeat CSF analyses can be used to monitor therapy. In TRAILBLAZER-AL2, thresholds to cease donanemab therapy were based on amyloid-PET, not CSF measures.

A prior model estimated that only 1.15% of Canadian patients with mild dementia or MCI due to AD had access to AD biomarker testing, assuming that half would have amyloid PET and half would have CSF testing(7). Switching to an all-CSF diagnostic strategy would increase the capacity by 46,000 per year; however, it was not clear whether the model inputs included variables related to LP availability(7). Capacity for performing LPs is limited and is centered in urban specialty practices. Typically, LP is within the scope of practice for neurologists and anaesthesiologists, but not geriatricians or geriatric psychiatrists. A survey of the CCNA membership indicated that CSF testing is available and reimbursed by provincial health authorities in British Columbia for patients meeting appropriate use guidelines(41), and in specialty dementia clinics in Alberta, Ontario, and Quebec. Currently, a clinical laboratory in British Columbia performs CSF testing with Health Canada-approved testing kits; elsewhere, testing must be sent out of province, and in some provinces special approvals may be required.

The accuracy of plasma markers of AD is approaching that of CSF or amyloid-PET(43), offering the potential for easier access to diagnostic testing. The highest diagnostic accuracy is not for plasma A $\beta$ , but rather for tau proteoforms phosphorylated at specific sites. Current data suggest that plasma ptau-217 has the best sensitivity and specificity for AD, including in early stages, and can discriminate it from other causes of neurodegeneration including non-AD tauopathies(44,45). However, more data are needed on the impact of assay types, clinical settings, polytherapy, and multiple comorbidities on test performance(43,46). Currently, there are no Health Canada licensed blood-based diagnostic kits for AD biomarker testing. Multiple manufacturers have created plasma-based test kits, and related trials (outside of Canada) are in progress with the aim of obtaining regulatory approval. Current unknowns are how and when provinces will build capacity for plasma testing, whether a centralized versus distributed model will be used. Additionally, appropriate use guidelines and reporting standards will need to be developed and implemented(47).

## Neuroimaging protocols

To use the anti-A $\beta$  mAbs in clinical practice will require pre-treatment and follow-up MRI and, ideally, amyloid-PET, although in many regions amyloid-beta may have to be diagnosed by CSF analysis, instead. In the Canadian context, requirements for more MRI and PET would place a significant burden on radiological and nuclear medicine resources. The availability of MR and PET imaging in Canada varies greatly between provinces. Additional research and planning are needed to clarify MRI and PET capacity, with respect to the number of treatment candidates in any given region.

In the CLARITY-AD and TRAILBLAZER-ALZ 2 trials, follow-up MRIs were required to screen for the presence of ARIA-E and ARIA-H; however, the exact frequency and timing varied by trial (Figure 1). Unfortunately, MRI technical parameters were not specified in sufficient detail in the trial publications and supplemental trial protocol documents to reproduce the drug-specific MRI protocol in routine practice, with incomplete details on the MRI field strength, slice thickness, and sequence types. It appears likely that the trial protocols followed 2011 consensus recommendations for ARIA screening, including minimum field strength 1.5T, maximum slice thickness of 5 mm without any specification on slice gaps, and use of the gradient recalled echo (GRE) sequence as it was “presently available on any scanner worldwide”)(28).

A challenge with using the trial protocols in routine practice is that imaging protocols have advanced, with (28), increasing adoption of more sensitive techniques including use of higher field strength (3T) and newer methods such as susceptibility imaging that can detect hemorrhage more readily. Susceptibility imaging at 3T can detect up to twice as many microbleeds, on average, as on GRE at 1.5 Tesla field strength(48). This creates a dilemma, as it is uncertain whether the trial thresholds for hemorrhagic lesions (>4 microbleeds or any [CLARITY-AD(3)] or more than one [TRAILBLAZER-ALZ 2(4)] area of superficial siderosis) are applicable when using higher sensitivity imaging.. More research is needed on the comparability of modern compared with older generation MRI imaging to predict and diagnose ARIA-H and ARIA-E. However, the Work Group recommends that, because of their superior overall diagnostic accuracy, dementia imaging protocols should continue to use the best sequences available at that site, including susceptibility imaging (Table S1).

MRI was used in the trials to monitor the risk for ARIA (Figure 1) (3,4). Because a diagnostic image has already been obtained, a monitoring MRI protocol could potentially be much shorter: a fluid attenuated inversion recovery (FLAIR) for ARIA-E and a hemorrhage sensitive sequence, preferably susceptibility imaging, for ARIA-H (Supplemental Table S1). This acquisition time for this short duration monitoring protocol could be as little as 10 minutes. To maximize comparability across scan sessions, the same protocol, and ideally the same scanner, should be used for each individual patient.

Adoption of the anti-A $\beta$  mAbs would also require changes in radiological reporting. Determining eligibility for therapy and grading the severity of ARIA events requires reporting of the axial diameter of areas of ARIA-E and the exact count of the number of hemorrhagic lesions. Radiologists would need to become familiar with accepted grading schemes, terms, and definitions of radiological manifestations of ARIA. The use of standard reporting templates, which could be embedded within electronic health records, and continuing medical education modules could help achieve greater standardization and quality.

## Organizing clinical care including infusions

The anti-A $\beta$  mAbs present specific challenges to the organization of clinical care. Lecanemab is administered intravenously over one hour every two weeks, while donanemab is administered intravenously over one hour every four weeks(3,4). Therefore, administering these treatments requires infusion service capacity, either in a hospital setting, out-patient infusion facility or, potentially, via home nursing visits. A list of equipment, supplies, and human resources required to administer lecanemab and donanemab is shown in Table S2.

Lecanemab and donanemab can elicit infusion-related reactions, occurring at the time of infusion, or up to several hours after the infusion, causing fever, chills, headache, rash, nausea, vomiting, abdominal discomfort, and elevated blood pressure (3,4). The rate of any infusion reactions was higher for lecanemab than donanemab (26.5% versus 8.7%) but so was the rate of placebo infusion reactions (7.4% versus 0.5%), suggesting that some of the difference may have been due to more sensitive ascertainment of adverse events. In contrast, the rate of serious infusion reactions was similar (1.2% for lecanemab versus 0.4% for donanemab). If a reaction occurs, the infusion should be stopped, and the patient may be treated with diphenhydramine and acetaminophen, or with oral dexamethasone or oral methylprednisolone when marked symptoms are present(30).

Because expertise in AD diagnostic testing and ongoing monitoring for ARIA are required, lecanemab and donanemab should be prescribed by a dementia specialist (*e.g.*, neurologist, geriatrician, geriatric psychiatrist) or a specialized family physician with extensive experience in the diagnosis and treatment of cognitive disorders, such as AD. A list of equipment, supplies, and human resources required to administer lecanemab and donanemab is shown in Supplemental Table S2. The care team should include a nurse or physician assistant who can assist the prescribing physician with logistical support surrounding ordering and receiving the results of baseline amyloid biomarkers and MRI, as well as ordering and receiving results of monitoring MRIs (*i.e.* assessing for emerging ARIA), in advance of continuing intravenous therapy. Involvement of a specialist would likely be required for the full duration of lecanemab and donanemab therapy; however, models of care could be developed whereby centres of expertise provide remote support via telemedicine. Because infusion-related reactions are most likely to occur within the first 9-13 weeks(30), hybrid models can be considered which may involve infusions given at centres of expertise for the initial period of treatment, followed by maintenance infusions given closer to a patient's primary residence. Models of care would need to be adapted to the organization of health regions, with their specific geographical and social features.

A subcutaneous formulation of lecanemab is being tested in clinical trials, which would allow at-home injection of lecanemab on a once-weekly basis. The availability of a self-injection device partially mitigates the need for home or clinic-based nursing care, but some support will still be necessary for education and support, including patients and caregivers who are unable to self-inject on their own.

One of the most important unanswered questions in therapy is when infusions should cease. In the TRAILBLAZER-ALZ II trial of donanemab, treatment was stopped if amyloid-PET signal normalized (which was the case in 29.7% of participants at 6 months and 76.4% at 12 months)(4) while in CLARITY-AD(3), and in TRAILBLAZER-ALZ II participants without amyloid clearance, infusions continued until 18 months. Currently, there are no published data on

the efficacy of lecanemab or donanemab beyond 18 months, although evidence will eventually be available from open-label extensions of both trials.

It is currently unknown whether treatment should be continued into the more advanced stages of dementia, when tau and vascular amyloid deposition will have accumulated to a greater degree. Many experts believe that higher tau may be associated with less clinical response to amyloid removal(4), and the presence of vascular amyloid (*i.e.*, cerebral amyloid angiopathy) increases the risk of ARIA(29). Thus, it is possible that the balance of benefits and risks is less favourable in later stage AD. However, in the absence of clear consensus guidelines it may be difficult for clinicians to stop therapy in patients desiring to continue treatment.

If amyloid is cleared, it is uncertain whether amyloid accumulates and how rapidly. If amyloid re-accumulates, it is not clear whether treatment should be re-initiated and what biomarker or clinical threshold should prompt re-initiation. These questions are being examined in ongoing studies.

Creation of a pan-Canadian longitudinal AD treatment registry will be essential to obtaining short- and long-term safety and efficacy data in the Canadian context. Such data may enable selection and expedited assessment of subjects who are most likely to benefit from treatment.

## **IMPLICATIONS FOR DEMENTIA SYSTEMS OF CARE**

### **Role of primary care and equitable access to treatment**

In Canada, primary care will have a critical role in identifying potential candidates for anti-A $\beta$  mAbs and helping patients to understand potential benefits and harms of treatment.

Currently, primary care clinicians face many well-documented challenges in the assessment and timely accurate diagnosis of early-stage AD(49,50). These include lack of time, knowledge and training, inadequate remuneration, and in most provinces, mandatory reporting of potentially unfit drivers to transportation authorities which can negatively affect clinician-patient relationships. Diagnosis of cognitively impaired but non-demented individuals (*i.e.*, MCI) has not been a priority in primary care(51), possibly because there are no currently approved pharmacological therapies. Further compounding access to timely diagnoses is the often-lengthy wait times for specialist consultation across many parts of Canada.

If anti-A $\beta$  mAbs become available, it will be important for primary care practitioners to identify potentially eligible patients with cognitive disorders and to refer these persons along local care pathways to access treatment. Validated rapid screening tools, such as the Mini-Cog and AD-8, may be used to screen for those in need of more a more detailed cognitive assessment to establish a diagnosis(52). Education outlining local care pathways and potential benefits and harms of anti-A $\beta$  mAbs for eligible patients can help primary care practitioners to knowledgeablely counsel patients and families and to initiate appropriate referrals for accurate diagnoses and potential treatment. However, there are insufficient specialists in dementia care and many rural and remote communities have limited access(7). Referrals of patients who have not been fully evaluated in primary care may overwhelm specialist center waiting lists and further delay access.

In all Canadian provinces, family physicians have the primary responsibility to diagnose and manage patients with dementia, reserving specialist referrals for a minority of more complex cases. Some provinces have implemented special recommendations and programs to support



family physicians, such as the Quebec Alzheimer Plan(53). To implement the use of anti-A $\beta$  mAbs in Canada, these programs will need to be enhanced and to accommodate recommendations for anti-A $\beta$  mAbs screening and use.

The College of Family Physicians of Canada offers a Certificate of Added Competence in the Care of the Elderly. While not exclusively focused on dementia, this certification program could be a vehicle for creating a cadre of family physicians with special expertise in screening for eligibility for anti-A $\beta$  mAbs, and perhaps for administering them.

Adoption of new innovative care models may be needed to address these significant challenges. For example, the Multi-specialty INterprofessional Team (MINT) Memory Clinics, which are now located in over 100 sites across 6 provinces, integrate collaborative partnerships between primary care and specialist care(54,55). Through standardized nationally-accredited training for family physicians and multidisciplinary teams in primary care, the MINT Memory Clinic model has demonstrated better health outcomes(56), better experience of care for patients and caregivers and for healthcare providers(57), service to rural and marginalized populations(55), and lower healthcare costs(58).

The introduction of a new, complex, and expensive therapy that requires special competence for delivery has the potential to exacerbate disparities in care for populations that are currently underserved, including non-White, Indigenous, Lesbian, Gay, Bisexual, Transgender, Queer or Questioning, Two-Spirit, lower socioeconomic status, immigrant, and rural populations(59). The reduced access of rural patients to specialty care(60,61) must be addressed. Innovative programs for remote access to memory clinics, such as those being developed by Saskatchewan's Rural Dementia Action Research team, may be one way to increase access(62).

### **Projected numbers of eligible patients**

The number of eligible patients will greatly affect the capacity of Canadian dementia systems to deliver anti-A $\beta$  mAbs. Analyses of system preparedness have suggested that there is little reserve capacity within the system, with challenges that include access to AD biomarker testing, access to specialist care, and MRI wait list times.(6,7,9,10)

A simulation model for Canada predicted that 382,000 Canadians would be on the waitlist for eligibility assessment for anti-A $\beta$  mAbs, but did not estimate the number of Canadians that would meet criteria for treatment after assessment(7). A limitation of the model was that it assumed that patients with primary care would be screened for MCI or dementia by their family physician, which is currently not recommended in primary care practice(63) and seems unrealistic to implement.

A report sponsored by Biogen and conducted by the RAND Corporation estimated that the number of persons over age 50 with MCI in Canada in 2020 was 1.75 million, of whom half would be positive for AD biomarkers(6). Using a simulation model, they estimated that Canada-wide population screening would result in 200,000 Canadians with MCI who were eligible for treatment and would seek treatment. However, there were many limitations to this model. Epidemiological studies show that the prevalence of MCI in older populations can vary by 16-fold (from 2.5% to 41%)(64) depending on which thresholds are used for cognitive test scores and how cognitive symptoms are elicited. Additionally, the RAND simulation model assumed that 80% of Canadians would agree to be screened and 50% of those who screened positive would see a specialist(6). These estimates are probably generous, as a recent randomized trial of dementia screening found that most participants (66%) who screened positive subsequently declined to see a specialist, even though it was part of the study protocol(65). This suggests that

most elderly prefer not to be screened; however, it is not known whether the potential to be treated with a disease-modifying treatment, albeit one with partial effect, would increase their enthusiasm. Given the unclear prevalence of MCI and dementia due to AD, the uncertain validity and acceptability of screening methods, and the lack of data on long-term health benefits and cost effectiveness of anti-A $\beta$  mAbs, the CCNA does not recommend population screening for anti-A $\beta$  mAbs eligibility.

Based on current practice patterns, the number of patients eligible for treatment is likely to be much lower than these pharmaceutical company projection because of under-recognition, the presence of contraindications and, potentially, patient choice.

There is under-recognition of dementia and MCI in current practice, that will limit referrals for treatment. A systematic review estimated that only 38% of people in the community with dementia had a diagnosis in their medical record(49), and a study of U.S. Medicare data found that only 8% of expected MCI cases were diagnosed(51). With a new treatment, rates of diagnosis may improve, but this would probably take time.

Based on the complex selection criteria (Table 4), many patients will not be eligible due to medical comorbidities and other contraindications. An analysis of the population-based Mayo Clinic Study on Aging found that only 8% of persons with MCI or mild dementia and positive amyloid-PET met the other criteria for the CLARITY-AD trial(66). MRI findings of cerebrovascular disease, cardiac conditions, and recent active cancer were common reasons for exclusion(66). Relaxing the trial criteria by including patients with MCI regardless of cognitive test score thresholds resulted in 17.4% meeting criteria for treatment(66). A population-based study from Sweden found that only 12/30 patients with biomarker-positive AD met criteria for treatment with lecanemab(67). A study of UK community memory clinics found that 71% of patients had a diagnosis of possible AD and that only 32% had no medical or imaging contraindications to anti-A $\beta$  mAbs and thus were eligible for AD biomarker testing(68). A study using Alberta administrative data found that at least 50% of persons with dementia would be ineligible based on medical comorbidities alone, before considering neuroimaging findings or AD biomarker results(69). Another study from an Alberta memory clinic found that only 23-34% of patients referred for MCI or AD would need amyloid-beta testing to determine eligibility for anti-A $\beta$  mAbs; the rest could be excluded because they did not meet trial eligibility criteria due to cognitive test result criteria, comorbidities, or neuroimaging criteria(70).

An important unknown is how many eligible patients would choose treatment if it were offered. Lecanemab and donanemab are intensive, time-consuming treatments that require frequent healthcare visits, multiple MRI scans (Figure 1), and potentially an LP. Given this burden, it seems likely that some patients will not choose to have treatment, particularly if they are frail or have other comorbidities. Currently, there is little research on patient preferences for treatment.

Research in the Canadian context is needed to provide estimates of eligible patients in Canada, which are critically important for resource allocation. Canadian national estimates of the prevalence and incidence of dementia are provided by the Public Health Agency of Canada (PHAC), based on administrative health data(71), and Alzheimer Society of Canada. However, these data sources are not suited to directly estimate the number of Canadians eligible for treatment with anti-A $\beta$  mAbs because dementia stage is not captured, MCI is not estimated, and there are only limited data on comorbidities that would preclude treatment.

In Canada, analyses of inclusion and exclusion criteria for treatment could be undertaken in population-based studies such as the Canadian Community Health Survey(72) and the

Canadian Longitudinal Study on Aging(73), and from multicenter clinic-based cohorts such as the Comprehensive Assessment of Neurodegeneration and Dementia Study(74). However, currently there is no population-based study in Canada that contains all the information, including amyloid-beta biomarker status, needed to determine eligibility for anti-A $\beta$  mAbs. Building capacity for dementia surveillance in Canada, including amyloid-beta biomarkers and neuroimaging, should be a priority.

## CONCLUSIONS

Lecanemab and donanemab are the first drugs to robustly lower cerebral amyloid-beta with partial effects on the rate of cognitive and functional decline, the clinical value of which continues to be debated. The drugs have been approved by some countries, including the US FDA, but not others. They are currently under review by Health Canada, which approves drugs for marketing in Canada, and the Canadian Drug Agency, which will issue a report that includes a cost effectiveness analysis.

Our review found strong evidence from phase 3 trials that lecanemab and donanemab slow the relative rate of decline on combined cognitive/functional scales by 27.1% and 22.3%, respectively, over an 18 month period. Effects on secondary outcomes were consistent with the primary outcomes. ARIA side effects were found radiologically in 21.5% and 36.8%, and were symptomatic in 2.8% and 6.1%. *APOE*  $\epsilon$ 4 homozygotes had a much higher risk of ARIA (close to 50%) and may not have derived clinical benefit, although conclusions about the efficacy in *APOE*  $\epsilon$ 4 homozygotes are limited by the post-hoc exploratory nature of these subgroup analyses, with relatively small numbers of participants and wide confidence intervals.

Implementing the anti-A $\beta$  mAbs in Canada would require substantial changes in the organization of dementia care. Five major barriers stand out. First, there is under-diagnosis of early stage AD in primary care(49). Second, there is a lack of access to specialist care, which contributes to the problem of under-diagnosis. The current number of specialists is insufficient to manage the patients that might be eligible for treatment(7). Third, AD biomarker testing is limited to a small number of specialists in limited geographic regions. Increasing its availability would require investing in more capacity for amyloid-PET and CSF testing and, once validated and Health Canada-approved kits are available, plasma testing. Fourth, the MRIs required for monitoring and managing ARIA will place a burden on radiological services, with many Canadian jurisdictions already experiencing long wait list times(75). Fifth, there would need to be systems of care for providing intravenous infusions.

There are many unanswered questions about the use of these therapies and their impact on the Canadian health system, deserving of future research. A list of some of the most important ones, generated by our Work Groups, is shown in Table 5. For individuals receiving therapy, it is not clear when therapy should stop, and, if amyloid-beta has been cleared, how long it takes to reaccumulate. Work will be needed to define the treatment eligible population in Canada, and patient and caregiver preferences for treatment. Advances in plasma testing may allow greater access to AD biomarkers. The cost effectiveness of therapy in Canada is not known, but will be explored by the Canadian Drug Agency. We did not summarize international data on cost effectiveness, because Canadian costs will differ. However, some studies are beginning to emerge(76-79). A company-sponsored study found that lecanemab was cost effective at a willingness-to-pay threshold of \$100,000 per quality-adjusted life-year gained(76), but an

academic analysis suggested that lecanemab was over-priced for the value of the clinical benefits(79).

In conclusion, the discovery that AD outcomes can be improved by effectively removing amyloid-beta is a landmark development, opening the door to new treatment strategies for this common, dreaded disease. Future drugs in this class may, hopefully, address some of the limitations of lecanemab and donanemab, including the need for intravenous infusion and the risk of ARIA. The findings of CLARITY-AD and TRAILBLAZER-ALZ 2 suggest that amyloid-beta removal will probably be a component of AD disease-modifying treatment, but to fully halt progression more effective drugs or combination approaches will still need to be discovered.

## **ACKNOWLEDGEMENTS**

EES (Chair), NP, HF, MB, and HC comprised the Steering Committee. AG, AH-B, PD, and AF Chaired Work Groups. RC and MM provided internal independent peer review. The other authors participated as members of Work Groups.

## **FUNDING**

The Canadian Consortium on Neurodegeneration in Aging is funded by the Canadian Institutes of Health Research (Grants: CNA-137794, CNA-163902, BDO-148341) with support from partner organizations (Alberta Prion Research Institute, Alberta Innovates, Alzheimer Research UK, Alzheimer Society of Canada, Brain Canada, Canadian Nurses Foundation, Centre for Aging + Brain Health Innovation, Consortium for the Early Identification of Alzheimer's Disease, Eli Lilly, Fonds de recherche du Québec – Santé, Hypertension Canada, Michael Smith Foundation for Health Research, New Brunswick Health Research Foundation, Nova Scotia Health Research Foundation, Ontario Brain Institute, Pfizer Canada Inc., Robin and Barry Picov Family Foundation, Sanofi, Saskatchewan Health Research Foundation, and Women's Brain Health Initiative).

## **DISCLOSURES**

AmanPreet Badhwar reports a grant from the Alzheimer Society of Canada, paid to her institution. Laura Barlow reports no disclosures. Robert Bartha reports no disclosures. Sarah Best reports honoraria from Eisai pharmaceuticals, paid to her. Jennifer Bethell reports no disclosures. Jaspreet Bhangu reports a contract from Eisai for site PI, paid to his institution; consulting for Eisai, unpaid; and consulting for Eli Lilly, paid to him. Sandra Black reports contracts with Genentech, Optina, Roche, Eli Lilly, Eisai/Biogen Idec, Novo Nordisk, Lilly Avid, and ICON, paid to her institution; grants from the Ontario Brain Institute, CIHR, Leducq Foundation, Heart and Stroke Foundation of Canada, NIH, Alzheimers Drug Discovery Foundation, Brain Canada, Weston Brain Institute, Canadian Partnership for Stroke Recovery, Canadian Foundation for Innovation, Focused Ultrasound Foundation, Alzheimers Association US, Queens University, Compute Canada Resources for Research Groups, CANARIE, and Networks of Centres of Excellence of Canada, paid to her institution; consulting for Novo Nordisk, Eisai, Eli Lilly, Roche, and Cpd network, paid to her; consulting for DSR: Diagnosis, Solutions & Results Inc.,

Conference Board Canada, World Dementia Council, University of Rochester Contribution to the Mission and Scientific Leadership of the Small Vessel VCID Biomarker Validation Consortium, National Institute of Neurological Disorders and Stroke, and Ontario Dementia Care Alliance (ODCA), paid to her institution; honoraria from Biogen, Roche, and Eisai, paid to her; and honoraria from Roche, unpaid. Christian Bocti reports stock in Imeka. Michael Borrie reports consulting for Eisai, Eli Lilly, Biogen, and Hoffmann-La Roche, paid to him; and contracts with Eisai, Eli Lilly, Biogen, Hoffmann-La Roche, and Alector, paid to his institution. Susan Bronskill reports grants from the Alzheimer Society of Canada, Brain Canada Foundation, Evaluative Clinical Sciences Research Platform of Sunnybrook Research Institute, Canadian Consortium on Neurodegeneration in Aging (CCNA), Canadian Institutes of Health Research, and Ontario Brain Institute, paid to her institution; and a contract with the Public Health Agency of Canada, paid to her institution. Amer Burhan reports a contract with the Toronto Memory Program (Headland Research), paid to him; consulting for Eisai, Avanir, Otsuka-Lundbeck, Boehringer-Ingelheim, and Roche Pharma, paid to him; and grants from the National Institute of Aging, Brain Canada Foundation, Alzheimer Drug Discovery Foundation, National Research Council, Weston Foundation, and Canada Institute for Health Research, paid to his institution. Frederic Calon reports meeting expenses from Eli Lilly, paid to him. Richard Camicioli reports grants from the Canadian Institutes of Health Research, National Institute of Health, Weston Foundation, paid to him; and support for attending meetings from Parkinson Canada, Canadian Movement Disorders Group, and the Canadian Consortium on Neurodegeneration in Aging, paid to him. Advisory boards for Ambroxal trial and Parkinson Canada, unpaid. Barry Campbell reports no disclosures. Howard Chertkow reports contracts as site PI for clinical trials with Hoffmann-La Roche Limited, TauRx, Eli Lilly Corp., Anavex Life Sciences, Alector LLC, Biogen MA Inc., IntelGenX Corp., and Immunocal, paid to his institution; and consulting for Eisai, Biogen, and Lilly Inc. in Canada, paid to his institution. D. Louis Collins reports no disclosures. Mahsa Dadar reports no disclosures. Mari DeMarco reports consulting for Roche and Eisai, paid to her; honoraria from Roche, paid to her; and a grant from Roche, paid to her institution. Philippe Desmarais reports consulting for Eisai, paid to him. Simon Ducharme reports contracts for clinical trials with Biogen, Janssen, Novo Nordisk, Alnylam, Passage Bio, and Innodem Neurosciences, paid to his institution; consulting for QuRALIS, Eisai, and Eli Lilly, paid to him; honoraria from Eisai, paid to him; and participation in a Data Safety Monitoring Board or Advisory Board for Aviado Bio and IntelGenX, paid to him. Simon Duchesne reports stock or stock options for True Positive Medical Devices Inc., paid to him; honoraria from Novo Nordisk, paid to him; and travel expenses from Eisai, paid to him. Gillian Einstein reports no disclosures. Howard Feldman reports consulting for Eisai Inc., Biogen, LuMind, and Novo Nordisk, paid to his institution; grants from Allyx Therapeutics, Vivoryon Therapeutics, Biohaven Pharmaceuticals, and LuMind Foundation, paid to his institution; royalties from the University of British Columbia, paid to him; a patent held by the University of British Columbia, paid to him; consulting for Axon Neuroscience, Arrowhead Pharmaceuticals, and Biosplice Therapeutics, paid to his institution; support for attending meetings or travel from Novo Nordisk Inc., Royal Society of Canada, Translating Research in Elder Care (TREC), and the Association for Frontotemporal Dementia (AFTD), with payments made to his institution; participation in a Data Safety Monitoring Board or Advisory Board for the Tau Consortium and Janssen Research & Development LLC, paid to his institution; and philanthropic support from the Epstein Family Alzheimers Research Collaboration, paid to his institution. John Fisk reports no disclosures. Andrew Frank reports consulting for Eli Lilly Canada, Eisai Canada, and Novo Nordisk, paid to

him. Aravind Ganesh reports grants from the Alzheimer Society of Canada and Alzheimer Society of Alberta and Northwest Territories, paid to his institution; and consulting for Biogen and Eisai, paid to him. Jodie Gawryluk reports no disclosures. Linda Grossman reports no disclosures. Arthur Harrison reports no disclosures. Alexandre Henri-Bhargava reports consulting for Eisai Canada and Eli Lilly, paid to him; contracts for clinical trials with Novo Nordisk, Cerevel, Anavex, IntelGenX, and Green Valley (Shanghai), paid to his institution; honoraria from the Canadian Coalition for Seniors Mental Health, paid to him; leadership in the Consortium of Canadian Centres for Clinical Cognitive Research and the Canadian Neurological Society, unpaid; and other financial or non-financial interests through the Neil and Susan Manning Cognitive Health Initiative, paid to his institution. Zahinoor Ismail reports consulting for CADTH, Eisai, Lilly, Lundbeck, Novo Nordisk, Otsuka, and Roche, paid to him. Inbal Itzhak reports no disclosures. Manish Joshi reports consulting for Eisai, Biogen, Eli Lilly, and Clario, paid to him. Edeltraut Kroger reports no disclosures. Sanjeev Kumar reports no disclosures. Robert Laforce reports consulting for Eisai and Eli Lilly, paid to him. Krista Lanctot reports grants from the Canadian Institutes of Health Research, Alzheimers Drug Discovery Foundation, Weston Foundation, Alzheimers Association (US), and Pooler Charitable Fund, paid to her institution; contracts with Cerevel and BioXcel, paid to her institution; consulting for Boehringer Ingelheim, Bright Minds, Bristol Myers Squibb, Cerevel, Eisai Co. Ltd, Exciva, Ironshore Pharmaceuticals, Kondor Pharma, H Lundbeck A/S, Novo Nordisk, and Praxis Therapeutics, paid to her; honoraria from Novo Nordisk, H Lundbeck, and Eisai, paid to her; support for attending meetings or travel from H Lundbeck and Eisai, paid to her institution; participation in a Data Safety Monitoring Board or advisory board for the PAS-MCI Study, unpaid; leadership in the American Association of Geriatric Psychiatry, unpaid; and receipt of equipment, materials, drugs, gifts, or services from PBG, paid to her institution. Meghan Lau reports no disclosures. Linda Lee reports consulting for Eisai, Lilly, Novo Nordisk, Lundbeck, and Roche, paid to her. Mario Masellis reports grants from the Canadian Institutes of Health Research, Weston Brain Institute, Ontario Brain Institute, Washington University, Women's Brain Health Initiative, Brain Canada, and EU Joint Program for Neurodegenerative Disease Research, paid to him; contracts for clinical trials with Roche and Alector, paid to him; consulting fees from Ionis, Alector, Biogen Canada, Wave Life Science, Eisai Canada, and Novo Nordisk Canada, paid to him; royalties from the Henry Stewart Talks, paid to him; honoraria from MINT Memory Clinics and ECHO Dementia Series, paid to him; and membership in Scientific Advisory Boards of the Alzheimer's Society Canada and Parkinson Canada, unpaid. Fadi Massoud reports honoraria from Astellas and Pfizer, paid to him; and consulting for Eisai and Novo Nordisk, paid to him. Sara Mitchell reports consulting for Eisai, paid to her; honoraria from Eisai and Eli Lilly, paid to her; support for attending meetings or travel from Eli Lilly, paid to her; and leadership in the Novo Nordisk Advisory Board, paid to her. Manuel Montero-Odasso reports no disclosures. Karen Myers Barnett reports no disclosures. Haakon Nygaard reports consulting for Eisai, paid to him; and participation in advisory boards for Biogen and Hoffmann-La Roche, paid to him. Stephen Pasternak reports a grant from Zywie Bio LLC, paid to his institution; consulting for Eisai, unpaid; an advisory board role for Zywie Bio LLC, unpaid; stock in Zywie Bio LLC; a patent through Zywie Bio LLC, unpaid; and leadership in the C5R Board, unpaid. Jody Peters reports no disclosures. Natalie Phillips reports no disclosures. M. Natasha Rajah reports no disclosures. Julie Robillard reports no disclosures. Kenneth Rockwood reports royalties from The Clinical Frailty Scale and the Pictorial Fit-Frail Scale, paid to his institution; honoraria from The Burnaby Family Practice, Chinese Medical Association, University of Nebraska-Omaha, the

Australia New Zealand Society of Geriatric Medicine, the Atria Institute, University of British Columbia, McMaster University, and Fraser Health Authority, paid to him; a US patent application submitted for Electronic Goal Attainment Scaling (patent number US20230402138A1); consulting for EIP Pharma Inc., the ADMET-2 advisory board (Johns Hopkins), and the Wake Forest University Medical School Centre advisory board, unpaid; advisory board roles with Ardea Outcomes, Danone, Hollister, INmune, Novartis, Takeda, and Nutricia, unpaid. Pedro Rosa-Neto reports no disclosures. Dallas Seitz reports a grant from the University Health Foundation - Alberta Roche Collaboration in Health, Alzheimers Association, and Alzheimer Society of Canada, paid to his institution; honoraria from the Canadian Coalition for Seniors Mental Health, Alberta Health Services, and Recovery Alberta, paid to him; and leadership on the Board of Directors for the Alzheimer Society of Alberta and Northwest Territories, unpaid. Eric Smith reports grants from the Canadian Institutes of Health Research, Weston Family Foundation, and Weston Brain Institute, paid to his institution; contracts for clinical trials from Biogen, paid to his institution; contracts with Sense Diagnostics and SFJ Pharmaceuticals, paid to his institution; royalties from UpToDate and UTI Limited Partnership, paid to him; consulting for Eisai, Eli Lilly, and Alnylam, unpaid; and participation in a Data Safety and Monitoring Board for NINDS, paid to him. Jean-Paul Soucy reports grants from the Weston Foundation and Canadian Institutes of Health Research, paid to his institution; a contract with Charles River, paid to his institution; and consulting for Biogen, paid to him. Shanna Trenaman reports being a patient advisor for a Delphi panel developing best practices for antipsychotic use in long-term care, unpaid. Cheryl Wellington reports grants from the Heart and Stroke Foundation of Canada, BrightFocus Foundation, and Cure Alzheimer Fund, paid to her institution; and consulting for NewAmsterdam Pharma, paid to her. Aicha Zadem reports no disclosures.

## REFERENCES

1. Knopman DS, Amieva H, Petersen RC, et al. Alzheimer disease. *Nature reviews Disease primers*. 2021;7:33. DOI: <https://doi.org/10.1038/s41572-021-00269-y>
2. Herrmann N, Lanctot KL, Hogan DB. Pharmacological recommendations for the symptomatic treatment of dementia: the Canadian Consensus Conference on the Diagnosis and Treatment of Dementia 2012. *Alzheimers Res Ther*. 2013;5:S5. DOI: <https://doi.org/10.1186/alzrt201>
3. van Dyck CH, Swanson CJ, Aisen P, et al. Lecanemab in early Alzheimer's disease. *N Engl J Med*. 2023;388:9-21. DOI: <https://doi.org/10.1056/NEJMoa2212948>
4. Sims JR, Zimmer JA, Evans CD, et al. Donanemab in early symptomatic Alzheimer disease: The TRAILBLAZER-ALZ 2 randomized clinical trial. *JAMA*. 2023;330:512-527. DOI: <https://doi.org/10.1001/jama.2023.13239>
5. Budd Haeberlein S, Aisen PS, Barkhof F, et al. Two Randomized Phase 3 Studies of Aducanumab in Early Alzheimer's Disease. *The journal of prevention of Alzheimer's disease*. 2022;9:197-210. DOI: <https://doi.org/10.14283/jpad.2022.30>
6. Liu J, Hlávka J, Coulter D, et al. *Assessing the preparedness of the Canadian health care system infrastructure for an Alzheimer's treatment*. RAND; 2019.

7. Black SE, Budd N, Nygaard HB, et al. A Model predicting healthcare capacity gaps for Alzheimer's disease-modifying treatment in Canada. *Can J Neurol Sci.* 2023;1-8. DOI: <https://10.1017/cjn.2023.270>
8. Watt JA, Isaranuwachai W, Grossman L, et al. Disease-modifying drugs for Alzheimer disease: implications for people in Canada. *CMAJ.* 2023;195:E1446-E1448. DOI: <https://10.1503/cmaj.230595>
9. Frank A, Ismail Z, Wilson M, et al. Health System Change for Alzheimer's Disease-Modifying Therapies in Canada: Beginning the Discussion. *Can J Neurol Sci.* 2023;1-9. DOI: <https://10.1017/cjn.2023.322>
10. Varette O, Baddeley A, Briere A, et al. Understanding the Portrait of Dementia Care in Canada: A CADTH Panel of Experts. *Canadian Journal of Health Technologies.* 2022;2.
11. Bocti C. Health system change for new therapies in Alzheimer's Disease: putting the cart before the horse? *Can J Neurol Sci.* 2024;1-6. DOI: <https://10.1017/cjn.2023.335>
12. Chertkow H, Phillips N, Rockwood K, et al. Impact of a national dementia research consortium: The Canadian Consortium on Neurodegeneration in Aging (CCNA). *Journal of Alzheimer's disease : JAD.* 2024: in press.
13. Snowball E, Fernandez Loughlin R, Eagleson H, et al. Engagement of people with lived experience of dementia advisory group and cross-cutting program: reflections on the first year. *Research involvement and engagement.* 2022;8:28. DOI: <https://10.1186/s40900-022-00359-5>
14. Jelacic Kadic A, Vucic K, Dosenovic S, et al. Extracting data from figures with software was faster, with higher interrater reliability than manual extraction. *J Clin Epidemiol.* 2016;74:119-123. DOI: <https://10.1016/j.jclinepi.2016.01.002>
15. Morris JC. The Clinical Dementia Rating (CDR): current version and scoring rules. *Neurology.* 1993;43:2412-2414.
16. Tucker S, Moller C, Tegerstedt K, et al. The murine version of BAN2401 (mAb158) selectively reduces amyloid-beta protofibrils in brain and cerebrospinal fluid of tg-ArcSwe mice. *Journal of Alzheimer's disease : JAD.* 2015;43:575-588. DOI: <https://10.3233/JAD-140741>
17. Wessels AM, Siemers ER, Yu P, et al. A combined measure of cognition and function for clinical trials: The Integrated Alzheimer's Disease Rating Scale (iADRS). *The journal of prevention of Alzheimer's disease.* 2015;2:227-241. DOI: <https://10.14283/jpad.2015.82>
18. Demattos RB, Lu J, Tang Y, et al. A plaque-specific antibody clears existing beta-amyloid plaques in Alzheimer's disease mice. *Neuron.* 2012;76:908-920. DOI: <https://10.1016/j.neuron.2012.10.029>
19. Cohen S, van Dyck CH, Gee M, et al. Lecanemab Clarity AD: Quality-of-Life Results from a Randomized, Double-Blind Phase 3 Trial in Early Alzheimer's Disease. *The journal of prevention of Alzheimer's disease.* 2023;10:771-777. DOI: <https://10.14283/jpad.2023.123>
20. Sarkisian CA, Romanov A, Mafi JN. Talking With Patients About the New Anti-amyloid Alzheimer Disease Medications. *Annals of internal medicine.* 2024;177:246-248. DOI: <https://10.7326/M23-3377>
21. Muir RT, Hill MD, Black SE, et al. Minimal clinically important difference in Alzheimer's disease: Rapid review. *Alzheimer's & dementia : the journal of the Alzheimer's Association.* 2024;20:3352-3363. DOI: <https://10.1002/alz.13770>



22. Dickson SP, Wessels AM, Dowsett SA, et al. 'Time Saved' as a demonstration of clinical meaningfulness and illustrated using the donanemab TRAILBLAZER-ALZ study findings. *The journal of prevention of Alzheimer's disease*. 2023;10:595-599. DOI: <https://10.14283/jpad.2023.50>
23. Rockwood K, MacKnight C. Assessing the clinical importance of statistically significant improvement in anti-dementia drug trials. *Neuroepidemiology*. 2001;20:51-56. DOI: <https://10.1159/000054761>
24. Rockwood K. Size of the treatment effect on cognition of cholinesterase inhibition in Alzheimer's disease. *J Neurol Neurosurg Psychiatry*. 2004;75:677-685. DOI: <https://10.1136/jnnp.2003.029074>
25. Rockwood K, Howlett SE, Hoffman D, et al. Clinical meaningfulness of Alzheimer's Disease Assessment Scale-Cognitive subscale change in relation to goal attainment in patients on cholinesterase inhibitors. *Alzheimer's & dementia : the journal of the Alzheimer's Association*. 2017;13:1098-1106. DOI: <https://10.1016/j.jalz.2017.02.005>
26. Arsenault-Lapierre G, Bui TX, Le Berre M, et al. Rural and urban differences in quality of dementia care of persons with dementia and caregivers across all domains: a systematic review. *BMC Health Serv Res*. 2023;23:102. DOI: <https://10.1186/s12913-023-09100-8>
27. Lin PJ, Daly AT, Olchanski N, et al. Dementia Diagnosis Disparities by Race and Ethnicity. *Medical care*. 2021;59:679-686. DOI: <https://10.1097/MLR.0000000000001577>
28. Sperling RA, Jack CR, Jr., Black SE, et al. Amyloid-related imaging abnormalities in amyloid-modifying therapeutic trials: recommendations from the Alzheimer's Association Research Roundtable Workgroup. *Alzheimer's & dementia : the journal of the Alzheimer's Association*. 2011;7:367-385. DOI: [https://S1552-5260\(11\)02506-4](https://S1552-5260(11)02506-4) [pii] 10.1016/j.jalz.2011.05.2351
29. Hampel H, Elhage A, Cho M, et al. Amyloid-related imaging abnormalities (ARIA): radiological, biological and clinical characteristics. *Brain : a journal of neurology*. 2023;146:4414-4424. DOI: <https://10.1093/brain/awad188>
30. Cummings J, Apostolova L, Rabinovici GD, et al. Lecanemab: appropriate use recommendations. *The journal of prevention of Alzheimer's disease*. 2023;10:362-377. DOI: <https://10.14283/jpad.2023.30>
31. Sun X, Ioannidis JP, Agoritsas T, et al. How to use a subgroup analysis: users' guide to the medical literature. *JAMA*. 2014;311:405-411. DOI: <https://10.1001/jama.2013.285063>
32. Piller C. Scientists tie third clinical trial death to experimental Alzheimer's drug. In: *Science*. American Association for the Advancement of Science; 2022.
33. Reish NJ, Jamshidi P, Stamm B, et al. Multiple cerebral hemorrhages in a patient receiving lecanemab and treated with t-PA for stroke. *N Engl J Med*. 2023;388:478-479. DOI: <https://10.1056/NEJMc2215148>
34. Sevigny J, Suhay J, Chiao P, et al. Amyloid PET Screening for Enrichment of Early-Stage Alzheimer Disease Clinical Trials: Experience in a Phase 1b Clinical Trial. *Alzheimer disease and associated disorders*. 2016;30:1-7. DOI: <https://10.1097/WAD.0000000000000144>
35. Ismail Z, Black SE, Camicioli R, et al. Recommendations of the 5th Canadian Consensus Conference on the diagnosis and treatment of dementia. *Alzheimer's & dementia : the*

- journal of the Alzheimer's Association. 2020;16:1182-1195. DOI: <https://10.1002/alz.12105>
36. Laforce R, Rosa-Neto P, Soucy JP, et al. Canadian Consensus Guidelines on Use of Amyloid Imaging in Canada: Update and Future Directions from the Specialized Task Force on Amyloid imaging in Canada. *Can J Neurol Sci.* 2016;43:503-512. DOI: <https://10.1017/cjn.2015.401>
  37. Wang D, Kowalewski EK, Koch G. Application of Meta-analysis to Evaluate Relationships Among ARIA-E Rate, Amyloid Reduction Rate, and Clinical Cognitive Response in Amyloid Therapeutic Clinical Trials for Early Alzheimer's Disease. *Therapeutic innovation & regulatory science.* 2022;56:501-516. DOI: <https://10.1007/s43441-022-00390-4>
  38. Minoshima S, Drzezga AE, Barthel H, et al. SNMMI Procedure Standard/EANM Practice Guideline for Amyloid PET Imaging of the Brain 1.0. *J Nucl Med.* 2016;57:1316-1322. DOI: <https://10.2967/jnumed.116.174615>
  39. Chao Y-S, Sinclair A, Morrison A, et al. The Canadian Medical Imaging Inventory 2019–2020. 2022.
  40. Blennow K. A Review of Fluid Biomarkers for Alzheimer's Disease: Moving from CSF to Blood. *Neurology and therapy.* 2017;6:15-24. DOI: <https://10.1007/s40120-017-0073-9>
  41. Shaw LM, Arias J, Blennow K, et al. Appropriate use criteria for lumbar puncture and cerebrospinal fluid testing in the diagnosis of Alzheimer's disease. *Alzheimer's & dementia : the journal of the Alzheimer's Association.* 2018;14:1505-1521. DOI: <https://10.1016/j.jalz.2018.07.220>
  42. Delaby C, Teunissen CE, Blennow K, et al. Clinical reporting following the quantification of cerebrospinal fluid biomarkers in Alzheimer's disease: An international overview. *Alzheimer's & dementia : the journal of the Alzheimer's Association.* 2022;18:1868-1879. DOI: <https://10.1002/alz.12545>
  43. Schindler SE, Galasko D, Pereira AC, et al. Acceptable performance of blood biomarker tests of amyloid pathology - recommendations from the Global CEO Initiative on Alzheimer's Disease. *Nat Rev Neurol.* 2024;20:426-439. DOI: <https://10.1038/s41582-024-00977-5>
  44. Ashton NJ, Brum WS, Di Molfetta G, et al. Diagnostic Accuracy of a Plasma Phosphorylated Tau 217 Immunoassay for Alzheimer Disease Pathology. *JAMA neurology.* 2024;81:255-263. DOI: <https://10.1001/jamaneurol.2023.5319>
  45. Arranz J, Zhu N, Rubio-Guerra S, et al. Diagnostic performance of plasma pTau(217), pTau(181), Abeta(1-42) and Abeta(1-40) in the LUMIPULSE automated platform for the detection of Alzheimer disease. *Alzheimers Res Ther.* 2024;16:139. DOI: <https://10.1186/s13195-024-01513-9>
  46. DeMarco ML, Algeciras-Schimmich A, Budelier MM. Blood tests for Alzheimer's disease: The impact of disease prevalence on test performance. *Alzheimer's & Dementia.* 2024;20:3661.
  47. Mielke MM, Anderson M, Ashford JW, et al. Considerations for widespread implementation of blood-based biomarkers of Alzheimer's disease. *Alzheimer's & dementia : the journal of the Alzheimer's Association.* 2024. DOI: <https://10.1002/alz.14150>

48. Nandigam RN, Viswanathan A, Delgado P, et al. MR imaging detection of cerebral microbleeds: effect of susceptibility-weighted imaging, section thickness, and field strength. *AJNR American journal of neuroradiology*. 2009;30:338-343. DOI: <https://10.3174/ajnr.A1355>
49. Lang L, Clifford A, Wei L, et al. Prevalence and determinants of undetected dementia in the community: a systematic literature review and a meta-analysis. *BMJ Open*. 2017;7:e011146. DOI: <https://10.1136/bmjopen-2016-011146>
50. Bradford A, Kunik ME, Schulz P, et al. Missed and delayed diagnosis of dementia in primary care: prevalence and contributing factors. *Alzheimer disease and associated disorders*. 2009;23:306-314. DOI: <https://10.1097/WAD.0b013e3181a6bebc>
51. Liu Y, Jun H, Becker A, et al. Detection Rates of Mild Cognitive Impairment in Primary Care for the United States Medicare Population. *The journal of prevention of Alzheimer's disease*. 2024;11:7-12. DOI: <https://10.14283/jpad.2023.131>
52. Tang-Wai DF, Smith EE, Bruneau MA, et al. CCCDTD5 recommendations on early and timely assessment of neurocognitive disorders using cognitive, behavioral, and functional scales. *Alzheimer's & dementia : the journal of the Alzheimer's Association*. 2020;6:e12057. DOI: <https://10.1002/trc2.12057>
53. Vedel I, Sourial N, Arsenault-Lapierre G, et al. Impact of the Quebec Alzheimer Plan on the detection and management of Alzheimer disease and other neurocognitive disorders in primary health care: a retrospective study. *CMAJ Open*. 2019;7:E391-e398. DOI: <https://10.9778/cmajo.20190053>
54. Lee L, Hillier LM, Stolee P, et al. Enhancing dementia care: a primary care-based memory clinic. *Journal of the American Geriatrics Society*. 2010;58:2197-2204. DOI: <https://10.1111/j.1532-5415.2010.03130.x>
55. Lee L, Hillier LM, Heckman G, et al. Primary Care-Based Memory Clinics: Expanding Capacity for Dementia Care. *Canadian journal on aging = La revue canadienne du vieillissement*. 2014;33:307-319. DOI: <https://10.1017/S0714980814000233>
56. Lee L, Hillier LM, McKinnon Wilson J, et al. Effect of Primary Care-Based Memory Clinics on Referrals to and Wait-Time for Specialized Geriatric Services. *Journal of the American Geriatrics Society*. 2018;66:631-632. DOI: <https://10.1111/jgs.15169>
57. Lee L, Slonim K, Hillier LM, et al. Persons with dementia and care partners' perspectives on memory clinics in primary care. *Neurodegenerative disease management*. 2018;8:385-397. DOI: <https://10.2217/nmt-2018-0024>
58. Wong WWL, Lee L, Walker S, et al. Cost-utility analysis of a multispecialty interprofessional team dementia care model in Ontario, Canada. *BMJ Open*. 2023;13:e064882. DOI: <https://10.1136/bmjopen-2022-064882>
59. Godard-Sebillotte C, Navani S, Hacker G, et al. Considering inequities in national dementia strategies: breadth, depth, and scope. *Int J Equity Health*. 2024;23:75. DOI: <https://10.1186/s12939-024-02166-8>
60. Arsenault-Lapierre G, Godard-Sebillotte C, Bui T, et al. Rural-Urban Differences in Healthcare Use in Persons With Dementia Between 2000 and 2019: A Quebec Population-Based Study. *Healthc Policy*. 2024;19:78-95. DOI: <https://10.12927/hcpol.2024.27281>
61. Kosteniuk J, Osman BA, Osman M, et al. Rural-urban differences in use of health services before and after dementia diagnosis: a retrospective cohort study. *BMC Health Serv Res*. 2024;24:399. DOI: <https://10.1186/s12913-024-10817-3>

62. Morgan DG, Kosteniuk J, Bayly M. Perceptions and outcomes of an embedded Alzheimer Society First Link Coordinator in rural primary health care memory clinics. *BMC Health Serv Res.* 2024;24:607. DOI: <https://10.1186/s12913-024-11066-0>
63. Canadian Task Force on Preventive Health C, Pottie K, Rahal R, et al. Recommendations on screening for cognitive impairment in older adults. *CMAJ.* 2016;188:37-46. DOI: <https://10.1503/cmaj.141165>
64. Stephan BC, Brayne C, McKeith IG, et al. Mild cognitive impairment in the older population: Who is missed and does it matter? *International journal of geriatric psychiatry.* 2008;23:863-871. DOI: <https://10.1002/gps.2013>
65. Fowler NR, Perkins AJ, Gao S, et al. Risks and Benefits of Screening for Dementia in Primary Care: The Indiana University Cognitive Health Outcomes Investigation of the Comparative Effectiveness of Dementia Screening (IU CHOICE) Trial. *Journal of the American Geriatrics Society.* 2020;68:535-543. DOI: <https://10.1111/jgs.16247>
66. Pittock RR, Aakre JA, Castillo AM, et al. Eligibility for Anti-Amyloid Treatment in a Population-Based Study of Cognitive Aging. *Neurology.* 2023;101:e1837-e1849. DOI: <https://10.1212/WNL.0000000000207770>
67. Dittrich A, Westman E, Shams S, et al. Proportion of Community-Dwelling Individuals Older Than 70 Years Eligible for Lecanemab Initiation: The Gothenburg H70 Birth Cohort Study. *Neurology.* 2024;102:e209402. DOI: <https://10.1212/WNL.0000000000209402>
68. Dobson R, Patterson K, Malik R, et al. Eligibility for antiamyloid treatment: preparing for disease-modifying therapies for Alzheimer's disease. *J Neurol Neurosurg Psychiatry.* 2024;95:796-803. DOI: <https://10.1136/jnnp-2024-333468>
69. Chowdhury M, Thomas G, Kirkham J, et al. Estimating Potential Eligibility for Disease Modifying Therapies within a Population-Based Sample of Individuals Diagnosed with Dementia in Alberta, Canada. Paper/Poster presented 2024; Philadelphia, PA.
70. Thomas G, Smith E, Ismail Z, et al. Eligibility for Treatment with Disease Modifying Therapies for Alzheimer's Disease Among Individuals Assessed in a Tertiary Care Specialty Dementia Clinical Program in Calgary, Alberta. *Canadian Geriatrics Journal.* 2024;27:386-387.
71. Jaakkimainen RL, Bronskill SE, Tierney MC, et al. Identification of physician-diagnosed Alzheimer's disease and related dementias in population-based administrative data: A validation study using family physicians' electronic medical records. *Journal of Alzheimer's disease : JAD.* 2016;54:337-349. DOI: <https://10.3233/JAD-160105>
72. Forbes DA, Morgan D, Janzen BL. Rural and urban Canadians with dementia: use of health care services. *Canadian journal on aging = La revue canadienne du vieillissement.* 2006;25:321-330. DOI: <https://10.1353/cja.2007.0003>
73. Mayhew AJ, Hogan D, Raina P, et al. Protocol for validating an algorithm to identify neurocognitive disorders in Canadian Longitudinal Study on Aging participants: an observational study. *BMJ Open.* 2023;13:e073027. DOI: <https://10.1136/bmjopen-2023-073027>
74. Chertkow H, Borrie M, Whitehead V, et al. The Comprehensive Assessment of Neurodegeneration and Dementia: Canadian Cohort Study. *Can J Neurol Sci.* 2019;46:499-511. DOI: <https://10.1017/cjn.2019.27>
75. Canadian Medical Imaging Inventory 2022-2023: MRI. *Canadian Journal of Health Technologies.* 2024;4:1-37.

76. Tahami Monfared AA, Ye W, Sardesai A, et al. Estimated Societal Value of Lecanemab in Patients with Early Alzheimer's Disease Using Simulation Modeling. *Neurology and therapy*. 2023;12:795-814. DOI: <https://10.1007/s40120-023-00460-1>
77. Igarashi A, Azuma MK, Zhang Q, et al. Predicting the Societal Value of Lecanemab in Early Alzheimer's Disease in Japan: A Patient-Level Simulation. *Neurology and therapy*. 2023;12:1133-1157. DOI: <https://10.1007/s40120-023-00492-7>
78. Wright AC, Lin GA, Whittington MD, et al. The effectiveness and value of lecanemab for early Alzheimer disease: A summary from the Institute for Clinical and Economic Review's California Technology Assessment Forum. *J Manag Care Spec Pharm*. 2023;29:1078-1083. DOI: <https://10.18553/jmcp.2023.29.9.1078>
79. Nguyen HV, Mital S, Knopman DS, et al. Cost-Effectiveness of Lecanemab for Individuals With Early-Stage Alzheimer Disease. *Neurology*. 2024;102:e209218. DOI: <https://10.1212/WNL.0000000000209218>

**Figure 1. Design of the CLARITY-AD (Lecanemab) and TRAILBLAZER-ALZ2 (Donanemab) Clinical Trials**

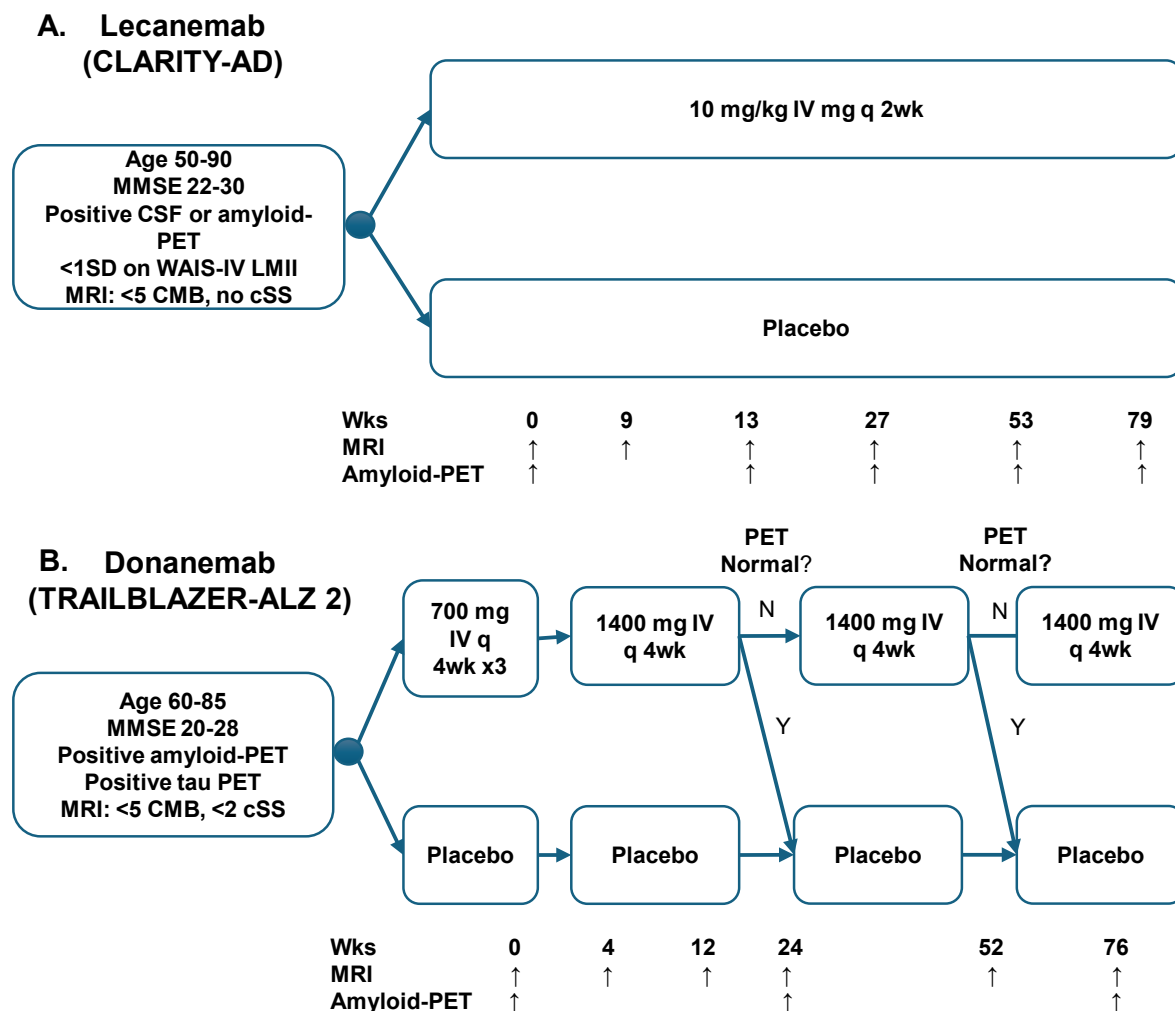

**Figure 1 Legend:** In TRAILBLAZER-ALZ 2, participants on donanemab crossed over to the placebo arm at 24 weeks or 52 weeks if the amyloid-PET was <11 Centiloids on any single PET scan or  $\geq 11$  but <25 Centiloids on 2 consecutive PET scans. CMB, cerebral microbleed; cSS, cortical superficial siderosis; CSF, cerebrospinal fluid; MMSE, Folstein Mini-Mental State Examination; MRI, magnetic resonance imaging; PET, positron emission tomography; WAIS-IV LMII, Wechsler Adult Intelligence Scale IV Logical Memory II test; Wks, weeks.

**Table 1. Primary Outcome and Selected Secondary Outcomes of CLARITY-AD and TRAILBLAZER-ALZ 2**

| Outcome                     | CLARITY-AD<br>(Lecanemab) | Mean     | 95% CI           | TRAILBLAZER-<br>ALZ 2<br>(Donanemab) | Mean        | 95% CI          |
|-----------------------------|---------------------------|----------|------------------|--------------------------------------|-------------|-----------------|
| Primary                     | <b>CDR-SB</b>             |          |                  | <b>iADRS</b>                         |             |                 |
|                             |                           |          |                  | <b>Low-medium tau</b>                |             |                 |
|                             | Lecanemab                 | +1.21    | --               | Donanemab                            | -6.02       | -7.01 to -5.03  |
|                             | Placebo                   | +1.66    | --               | Placebo                              | -9.27       | -10.23 to -8.31 |
|                             | Difference                | -0.45*** | (-0.67 to -0.23) | Difference                           | +3.25       | 1.88- to .62*** |
|                             | Slowing                   | 27.1%    | --               | Slowing                              | 35.1%       | 19.9-50.2%      |
|                             |                           |          |                  | <b>Combined</b>                      |             |                 |
|                             |                           |          |                  | Donanemab                            | -10.2       | -11.2 to -9.32  |
|                             |                           |          |                  | Placebo                              | -13.1       | -14.1 to -12.13 |
|                             |                           |          |                  | Difference                           | +2.92       | 1.51-4.33***    |
|                             |                           |          | Slowing          | 22.3%                                | 11.49-33.2% |                 |
| <b>CDR-SB</b>               | See above                 |          |                  | <b>Low-medium tau</b>                |             |                 |
|                             |                           |          |                  | Donanemab                            | +1.20       | 1.00 to 1.41    |
|                             |                           |          |                  | Placebo                              | +1.88       | 1.68 to 2.08    |
|                             |                           |          |                  | Difference                           | -0.67***    | -0.95 to -0.40  |
|                             |                           |          |                  | Slowing                              | 36.0%       | 20.8-50.2%      |
|                             |                           |          |                  | <b>Combined</b>                      |             |                 |
|                             |                           |          |                  | Donanemab                            | +1.72       | 1.53 to 1.91    |
|                             |                           |          |                  | Placebo                              | +2.42       | 2.24 to 2.60    |
|                             |                           |          |                  | Difference                           | -0.70       | -0.95 to -0.45  |
|                             |                           |          |                  | Slowing                              | 28.9%       | 18.3-39.5%      |
| <b>Time to CDR Increase</b> | Lecanemab                 | 31.9%    | --               | <b>Low-medium</b>                    |             |                 |
|                             | Placebo                   | 23.4%    | --               | Donanemab                            | 30.3%       | --              |
|                             | Risk diff                 | 8.5%     | --               | Placebo                              | 19.9%       | --              |
|                             | Hazard ratio              | 0.69     | --               | Risk difference                      | 10.4%       | --              |
|                             |                           |          |                  | Hazard ratio                         | 0.61        | 0.47-0.80       |
|                             |                           |          |                  | <b>Low-medium</b>                    |             |                 |
|                             |                           |          |                  | Donanemab                            | 36.4%       | --              |
|                             |                           |          |                  | Placebo                              | 25.6%       | --              |
|                             |                           |          |                  | Risk difference                      | 10.8%       | --              |
|                             |                           |          |                  | HR                                   | 0.63        | 0.51 to 0.77    |
| <b>Activities of Living</b> | <b>ADCS-MCI-ADL</b>       |          |                  | <b>ADCS-IADL</b>                     |             |                 |
|                             |                           |          |                  | <b>Low-medium tau</b>                |             |                 |
|                             | Lecanemab                 | -3.5     | --               | Donanemab                            | -2.76       | -3.42 to -2.10  |
|                             | Placebo                   | -5.5     | --               | Placebo                              | -4.59       | -5.23 to -3.95  |
|                             | Difference                | +2.0***  | (1.2 to -2.8)    | Difference                           | +1.83***    | 0.91 to 2.75    |
|                             |                           |          |                  | Slowing                              | 39.9%       | 19.2-60.6%      |
|                             |                           |          |                  | <b>Combined</b>                      |             |                 |
|                             |                           |          |                  | Donanemab                            | -4.42       | -5.05 to -3.80  |
|                             |                           |          |                  | Placebo                              | -6.13       | -6.72 to -5.53  |
|                             |                           |          |                  | Difference                           | +1.70***    | 0.8 to 2.6      |
|                             |                           |          | Slowing          | 27.8%                                | 13.4-42.1%  |                 |
| <b>MMSE</b>                 | Not reported              |          |                  | <b>Low-medium tau</b>                |             |                 |
|                             |                           |          |                  | Donanemab                            | -1.61       | -1.89 to -1.33  |
|                             |                           |          |                  | Placebo                              | -2.09       | -2.36 to -1.81  |
|                             |                           |          |                  | Difference                           | +0.48*      | 0.09 to 0.87    |
|                             |                           |          |                  | Slowing                              | 22.9%       | 4.0-41.8%       |
|                             |                           |          |                  | <b>Combined</b>                      |             |                 |

|                        |            |             |                |                       |          |                |
|------------------------|------------|-------------|----------------|-----------------------|----------|----------------|
|                        |            |             |                | Donanemab             | -2.47    | -2.73 to -2.20 |
|                        |            |             |                | Placebo               | -2.94    | -3.20 to -2.69 |
|                        |            |             |                | Difference            | +0.47*   | 0.10 to 0.84   |
|                        |            |             |                | Slowing               | 16.1%    | 3.5-28.7%      |
| <b>ADAS-Cog</b>        |            |             |                | <b>Low-medium tau</b> |          |                |
|                        | Lecanemab  | +4.14       | --             | Donanemab             | +3.17    | 2.64 to 3.69   |
|                        | Placebo    | +5.58       | --             | Placebo               | +4.69    | 4.18 to 5.20   |
|                        | Difference | -1.44***    | -2.27 to -0.61 | Difference            | -1.52*** | -2.25 to -0.79 |
|                        |            |             |                | Slowing               | 32.4%    | 16.6-48.4%     |
|                        |            |             |                | <b>Combined</b>       |          |                |
|                        |            |             |                | Donanemab             | +5.46    | 4.91 to 6.01   |
|                        |            |             |                | Placebo               | +6.79    | 6.26 to 7.32   |
|                        |            |             |                | Difference            | -1.33*** | -2.09 to -0.57 |
|                        |            |             |                | Slowing               | 19.5%    | 8.2-30.8%      |
| <b>Amyloid removal</b> |            |             |                | <b>Low-medium tau</b> |          |                |
|                        | Lecanemab  | -55.5       | --             | Donanemab             | -88.0    | --             |
|                        | Placebo    | +3.64       | --             | Placebo               | +0.2%    | --             |
|                        | Difference | -59.1***    | -62.6 to -55.6 | Difference            | -88.2*** | --             |
|                        |            |             |                | <b>Combined</b>       |          |                |
|                        |            |             |                | Donanemab             | -87.0    | --             |
|                        |            |             |                | Placebo               | -0.7     | --             |
|                        |            |             |                | Difference            | -86.3*** | --             |
| <b>Quality of Life</b> | EQ-5D-5L   |             |                |                       |          |                |
|                        | Lecanemab  | -2.12       | -2.61 to -1.58 |                       |          |                |
|                        | Placebo    | -4.13       | -4.63 to -3.60 |                       |          |                |
|                        | Difference | +2.0**      | --             |                       |          |                |
|                        | Slowing    | 49%         | --             |                       |          |                |
|                        | QOL-AD     | Participant |                |                       |          |                |
|                        | Lecanemab  | -0.52       | -0.70 to -0.37 |                       |          |                |
|                        | Placebo    | -1.19       | -1.35 to -1.02 |                       |          |                |
|                        | Difference | +0.66**     | --             |                       |          |                |
|                        | Slowing    | 56%         | --             |                       |          |                |
|                        | QOL-AD     | Partner     |                |                       |          |                |
|                        | Lecanemab  | -1.82       | -1.99 to -1.63 |                       |          |                |
|                        | Placebo    | -2.34       | -2.52 to -2.18 |                       |          |                |
|                        | Difference | +0.54*      | --             |                       |          |                |
|                        | Slowing    | 23%         | --             |                       |          |                |
| <b>Caregiver ZBI</b>   | Lecanemab  | 3.58        | 3.21 to 3.97   |                       |          |                |
|                        | Placebo    | 5.79        | 5.41 to 6.13   |                       |          |                |
|                        | Difference | -2.2***     | --             |                       |          |                |

Table 1 Legend: \* $p < 0.05$  \*\* $p < 0.01$  \*\*\* $p < 0.001$ . Values are adjusted least-squares mean change from baseline at 18 months and their differences between treatment and placebo, except for time to global CDR change which is give as the percent with an increase to a higher global CDR at 18 months, the risk difference, and hazard ratio. Values are scale points, except for amyloid removal which is in centiloids. Numbers in brackets are 95% confidence limits; however, 95% confidence limits were not reported for all analyses. Time to global CDR change is based on a change from baseline to a higher global CDR (global CDR in trial participants could have values of 0.5, 1.0, 2.0 or 3.0; corresponding to questionable, mild, moderate, or severe dementia). ADAS-Cog, Alzheimer's Disease Assessment Scale-Cognitive Subscale; ADCS MCI-ADL, Alzheimer's Disease Cooperative Study-Activities of Daily Living Scale for Mild Cognitive Impairment; ADCS-IADL Alzheimer's Disease Cooperative Study-Instrumental Activities of Daily Living; CDR-SB, Clinical Dementia Rating Sum of Boxes; EQ-5D-5L, EuroQol 5D-5L; iADRS,



integrated Alzheimer's Disease Rating Scale; MMSE, Folstein MiniMental Status Exam; QOL-AD, Quality of Life-Alzheimer Disease scale; ZBI, Zarit Burden Interview.

**Table 2. Rates of Amyloid-Related Imaging Abnormalities (ARIA)**

| <b>ARIA type</b>                 | <b>CLARITY-AD</b> |                | <b>TRAILBLAZER-ALZ 2</b> |                |
|----------------------------------|-------------------|----------------|--------------------------|----------------|
|                                  | <b>Lecanemab</b>  | <b>Placebo</b> | <b>Donanemab</b>         | <b>Placebo</b> |
| Any ARIA (-E or -H)              | 21.5%             | 9.5%           | 36.8%                    | 14.9%          |
| ARIA-E (radiological)            | 12.6%             | 1.7%           | 24.0%                    | 1.9%           |
| ARIA-E (symptomatic)             | 2.8%              | 0.0%           | 6.1%                     | 0.1%           |
| ARIA-H (radiological, all types) | 17.3%             | 9.0%           | 31.4%                    | 13.6%          |
| New microbleeds                  | 14.0%             | 7.6%           | 26.8%                    | 12.5%          |
| New superficial siderosis        | 5.6%              | 2.3%           | 15.7%                    | 3.0%           |
| New macrohemorrhages             | 0.6%              | 0.1%           | 0.4%                     | 0.2%           |
| ARIA-H (symptomatic)             | 0.7%              | 0.2%           | 0.8%                     | 0.2%           |

**Table 3. Rates of ARIA and Mean CDR-SB Change According to *APOE* Genotype**

|                       | <b>Lecanemab<br/><i>APOE</i> ε4 status</b> |                         |                         | <b>Placebo<br/><i>APOE</i> ε4 status</b> |                       |                     |
|-----------------------|--------------------------------------------|-------------------------|-------------------------|------------------------------------------|-----------------------|---------------------|
|                       | None<br>N=278                              | Heterozygote<br>N=479   | Homozygote<br>N=141     | None<br>N=28<br>6                        | Heterozygote<br>N=478 | Homozygote<br>N=133 |
| ARIA-E                | 5.4%                                       | 10.9%                   | 32.6%                   | 0.3%                                     | 1.9%                  | 3.8%                |
| Symptomatic<br>ARIA-E | 1.4%                                       | 1.7%                    | 9.2%                    | 0%                                       | 0%                    | 0%                  |
| ARIA-H                | 11.9%                                      | 14.0%                   | 39.0%                   | 4.2%                                     | 8.6%                  | 21.1%               |
| CDR-SB                | -0.76<br>(-1.16, -0.35)                    | -0.51<br>(-0.79, -0.23) | +0.28<br>(-0.35, +0.88) | Ref                                      | Ref                   | Ref                 |

  

|                   | <b>Donanemab<br/><i>APOE</i> ε4 status</b> |                         |                        | <b>Placebo<br/><i>APOE</i> ε4 status</b> |                       |                     |
|-------------------|--------------------------------------------|-------------------------|------------------------|------------------------------------------|-----------------------|---------------------|
|                   | None<br>N=255                              | Heterozygote<br>N=595   | Homozygote<br>N=143    | None<br>N=25<br>0                        | Heterozygote<br>N=474 | Homozygote<br>N=146 |
| ARIA-E            | 15.7%                                      | 22.8%                   | 40.6%                  | 0.8%                                     | 1.9%                  | 3.4%                |
| Serious<br>ARIA-E | 0.4%                                       | 1.8%                    | 2.8%                   | 0%                                       | 0%                    | 0%                  |
| ARIA-H            | 18.8%                                      | 32.4%                   | 50.3%                  | 11.2%                                    | 12.0%                 | 20.5%               |
| Serious<br>ARIA-H | 0.4%                                       | 0.2%                    | 1.4%                   | 0%                                       | 0%                    | 0%                  |
| CDR-SB            | -0.76<br>(-1.21, -0.31)                    | -0.73<br>(-1.06, -0.40) | -0.41<br>(-1.00, 0.19) | Ref                                      | Ref                   | Ref                 |

**Table 3 Legend:** ARIA risk and clinical efficacy according to *APOE* genotype in the CLARITY-AD (lecanemab) and TRAILBLAZER-ALZ 2 (donanemab) trials. Values are percent (for ARIA) or, for CDR-SB, the adjusted mean difference from placebo (Ref). In TRAILBLAZER-ALZ 2, only the subset of symptomatic ARIA that was considered “serious” (*i.e.*, resulted in death, was life-threatening, required hospitalization, or caused persistent disability) was reported by *APOE* status. For ease of comparison, change in CDR-SB is shown for both trials; the interaction between *APOE* status and iADRS (the primary outcome in TRAILBLAZER-ALZ 2) was similar.

**Table 4. Patient selection criteria used in the clinical trials and on the FDA package labels**

| <b>Criterion</b>                                         | <b>CLARITY-AD<br/>Lecanemab</b>                                             | <b>TRAILBLAZER-<br/>ALZ2<br/>Donanemab</b> | <b>FDA Package<br/>Label for<br/>Leqimbi<br/>(Lecanemab)</b>                                                                                                             | <b>FDA Package<br/>Label for Kisunla<br/>(Donanemab)</b>                                                                                                                 |
|----------------------------------------------------------|-----------------------------------------------------------------------------|--------------------------------------------|--------------------------------------------------------------------------------------------------------------------------------------------------------------------------|--------------------------------------------------------------------------------------------------------------------------------------------------------------------------|
| <b>Age</b>                                               | 50-90                                                                       | 60-85                                      | 50-90                                                                                                                                                                    | Not specified.                                                                                                                                                           |
| <b>MMSE</b>                                              | ≥22 and ≤30                                                                 | 20-28                                      | Not specified, other than stating “mild cognitive impairment or mild dementia stage of disease, the population in which treatment was initiated in the clinical trials”. | Not specified, other than stating “mild cognitive impairment or mild dementia stage of disease, the population in which treatment was initiated in the clinical trials”. |
| <b>Clinical dementia rating</b>                          | MCI: CDR-Global=0.5, Memory box ≥0.5, AD: CDR-Global=0.5-1, Memory Box ≥0.5 | No criterion                               | Not specified, other than stating “mild cognitive impairment or mild dementia stage of disease, the population in which treatment was initiated in the clinical trials”. | Not specified, other than stating “mild cognitive impairment or mild dementia stage of disease, the population in which treatment was initiated in the clinical trials”. |
| <b>Amyloid</b>                                           | PET or CSF Aβ1–42                                                           | Elevated amyloid on florbetapir-PET        | Confirmation of amyloid-beta positive status required prior to starting (method not specified)                                                                           | Confirmation of amyloid-beta positive status required prior to starting (method not specified)                                                                           |
| <b>Tau</b>                                               | Not required                                                                | Elevated tau on flortaucipir PET           | Not required                                                                                                                                                             | Not required.                                                                                                                                                            |
| <b>APOE status</b>                                       | Not an entry criterion                                                      | Not an entry criterion                     | “Testing for APOE ε4 status should be performed prior to initiation of treatment to inform the risk of developing ARIA.”                                                 | “Testing for ApoE ε4 status should be performed prior to initiation of treatment to inform the risk of developing ARIA.”                                                 |
| <b>Body mass index (BMI)</b>                             | >17 and < 35                                                                | Not specified.                             | Not specified.                                                                                                                                                           | Not specified.                                                                                                                                                           |
| <b>Study partner</b>                                     | Yes                                                                         | Yes                                        | Not specified                                                                                                                                                            | Not specified                                                                                                                                                            |
| <b>Adequate vision and hearing for cognitive testing</b> | Not specified                                                               | Yes                                        | Not specified                                                                                                                                                            | Not specified                                                                                                                                                            |
| <b>Stable on other medications</b>                       | Yes, 12 weeks for standard AD therapy (if on them, no memantine in          | Yes, for 90 days                           | Not specified                                                                                                                                                            | Not specified                                                                                                                                                            |

|                                                                       |                                                                                                              |                                                                    |                                                                                                                                                                          |                                                                                                                                                                          |
|-----------------------------------------------------------------------|--------------------------------------------------------------------------------------------------------------|--------------------------------------------------------------------|--------------------------------------------------------------------------------------------------------------------------------------------------------------------------|--------------------------------------------------------------------------------------------------------------------------------------------------------------------------|
|                                                                       | Japan), 4 weeks permitted concomitant meds                                                                   |                                                                    |                                                                                                                                                                          |                                                                                                                                                                          |
| <b>Memory testing</b>                                                 | At least 1 standard deviation below the age-adjusted mean in the Wechsler Memory Scale IV–Logical Memory II. | No requirement                                                     | Not specified other than stating: “mild cognitive impairment or mild dementia stage of disease, the population in which treatment was initiated in the clinical trials.” | Not specified other than stating: “mild cognitive impairment or mild dementia stage of disease, the population in which treatment was initiated in the clinical trials.” |
| <b>MRI ARIA-H</b>                                                     | >4 microbleeds ( $\leq$ 10 mm), single macrohemorrhage (>10mm), any superficial siderosis were excluded.     | >4 CMBs on GRE, or >1 area of superficial siderosis were excluded. | No warning or contraindication.                                                                                                                                          | Warning: “The risk of ARIA-E and ARIA-H is increased in KISUNLA-treated patients with pretreatment microhemorrhages and/or superficial siderosis.”                       |
| <b>MRI WMH</b>                                                        | “Severe small vessel, or white matter disease”                                                               | “Severe white matter disease”                                      | Not specified                                                                                                                                                            | Not specified                                                                                                                                                            |
| <b>Other significant CNS disease or serious or unstable illnesses</b> | Excluded                                                                                                     | Excluded                                                           | Not specified                                                                                                                                                            | Not specified                                                                                                                                                            |
| <b>Immunological diseases</b>                                         | Excluded if not adequately controlled or treated with “biologic drugs”                                       | Excluded if “unstable”                                             | Not specified                                                                                                                                                            | Not specified                                                                                                                                                            |
| <b>Anticoagulants</b>                                                 | Included if on stable dose                                                                                   | Not specified.                                                     | “Caution should be exercised”                                                                                                                                            | “Caution should be exercised”                                                                                                                                            |
| <b>Alcohol or drug use disorder within 2 years</b>                    | Not mentioned specifically                                                                                   | Excluded if alcohol or drug use disorder within 2 years            | Not specified                                                                                                                                                            | Not specified                                                                                                                                                            |

**Table 5. Research questions**

|                                                                                                                                                                                                                                                                                                                                                                                                                                                                                                                                                                                                     |
|-----------------------------------------------------------------------------------------------------------------------------------------------------------------------------------------------------------------------------------------------------------------------------------------------------------------------------------------------------------------------------------------------------------------------------------------------------------------------------------------------------------------------------------------------------------------------------------------------------|
| <b>Efficacy and clinical impact</b>                                                                                                                                                                                                                                                                                                                                                                                                                                                                                                                                                                 |
| <ol style="list-style-type: none"> <li>1. Are there subgroups with a larger treatment response, and can they be predicted?</li> <li>2. What is the perspective of patients, care partners and caregivers on treatment outcomes and treatment desirability?</li> <li>3. What is the effect of treatment on a broader range of patient-reported outcomes, including quality of life and neuropsychiatric symptoms?</li> <li>4. What are the long-term effects of treatment after 18 months?</li> </ol>                                                                                                |
| <b>ARIA</b>                                                                                                                                                                                                                                                                                                                                                                                                                                                                                                                                                                                         |
| <ol style="list-style-type: none"> <li>1. Does the risk of treating <i>APOE</i> <math>\epsilon</math>4 homozygotes outweigh any clinical benefits?</li> <li>2. Can the risk of ARIA be predicted before treatment?</li> <li>3. Are there diagnostic biomarkers of ARIA that could be used in place of MRI scans?</li> <li>4. Are there pharmacological approaches to prevent or treat ARIA?</li> </ol>                                                                                                                                                                                              |
| <b>Subgroup responses</b>                                                                                                                                                                                                                                                                                                                                                                                                                                                                                                                                                                           |
| <ol style="list-style-type: none"> <li>1. Do females benefit from treatment with lecanemab?</li> <li>2. Is treatment effective in young onset AD (&lt;65 years old)?</li> <li>3. Is amyloid-beta removal effective in preclinical AD (amyloid-beta positive without symptoms)?</li> <li>4. Is treatment effective in patients who are frail or have comorbidities?</li> </ol>                                                                                                                                                                                                                       |
| <b>MRI imaging</b>                                                                                                                                                                                                                                                                                                                                                                                                                                                                                                                                                                                  |
| <ol style="list-style-type: none"> <li>1. What is the accuracy and reliability of diagnosing ARIA in routine practice?</li> <li>2. Can higher resolution, more sensitive SWI be substitute for GRE for determining treatment eligibility and detecting ARIA-H?</li> <li>3. What is the projected impact of anti-A<math>\beta</math> mAbs use on MRI and PET utilization in Canada?</li> </ol>                                                                                                                                                                                                       |
| <b>Organizing clinical care</b>                                                                                                                                                                                                                                                                                                                                                                                                                                                                                                                                                                     |
| <ol style="list-style-type: none"> <li>1. What should be the thresholds for stopping treatment, whether based on time, disease progression, or amyloid status?</li> <li>2. For patients that stop treatment due to effect removal of amyloid-beta, how quickly does it reaccumulate and should patients be treated again if it does?</li> <li>3. What is the clinical and safety profile of anti-A<math>\beta</math> mAbs in routine clinical practice?</li> <li>4. Can subcutaneous formulations, obviating the need for intravenous infusion, be developed that have similar efficacy?</li> </ol> |
| <b>Patient selection</b>                                                                                                                                                                                                                                                                                                                                                                                                                                                                                                                                                                            |
| <ol style="list-style-type: none"> <li>1. Would individuals with mixed disease (e.g., AD plus vascular disease) benefit from treatment?</li> <li>2. Would persons with atypical clinical syndromes (posterior cortical atrophy, frontal variant, logopenic aphasia) benefit from treatment?</li> <li>3. Would selecting based on tau markers identify a population with greater treatment benefits?</li> </ol>                                                                                                                                                                                      |
| <b>AD diagnostic markers</b>                                                                                                                                                                                                                                                                                                                                                                                                                                                                                                                                                                        |
| <ol style="list-style-type: none"> <li>1. Can capacity for CSF and PET testing in Canada be expanded to test all the patients that desire anti-A<math>\beta</math> mAbs?</li> <li>2. Are blood markers of AD accurate enough to be used for prescreening or diagnosis for eligibility for anti-A<math>\beta</math> mAbs?</li> </ol>                                                                                                                                                                                                                                                                 |
| <b>Role of primary care and access to treatment</b>                                                                                                                                                                                                                                                                                                                                                                                                                                                                                                                                                 |
| <ol style="list-style-type: none"> <li>1. How can MCI and dementia be diagnosed more accurately and efficiently in primary care?</li> <li>2. How can patients in remote and rural areas get access to diagnosis and treatment?</li> <li>3. Can anti-A<math>\beta</math> mAbs be provided to the population without causing disparities?</li> </ol>                                                                                                                                                                                                                                                  |
| <b>Potential eligible population</b>                                                                                                                                                                                                                                                                                                                                                                                                                                                                                                                                                                |
| <ol style="list-style-type: none"> <li>1. What are patient and caregiver preferences for treatment?</li> <li>2. What is the prevalence of MCI due to AD in Canada?</li> </ol>                                                                                                                                                                                                                                                                                                                                                                                                                       |

3. How many patients would be eligible for and select treatment?
